# Supplementary material for: Emissions of Intermediate- and Semi-Volatile Organic Compounds (I/SVOCs) from Different Cumulative Mileage Diesel Vehicles under Various Ambient Temperatures
Source: Copernicus journal article supplement (doi:10.5194/egusphere-2024-3290), 2024-11-04
Supplement: Supplementary file 1 [file egusphere-2024-3290-supplement.pdf]

1 **Supporting Information for:**

2

3 **Emissions of Intermediate- and Semi-Volatile Organic Compounds (I/SVOCs)**  
4 **from Different Cumulative Mileage Diesel Vehicles under Various Ambient**  
5 **Temperatures**

6 Shuwen Guo<sup>1</sup>, Xuan Zheng<sup>1\*</sup>, Xiao He<sup>1</sup>, Lewei Zeng<sup>1</sup>, Liqiang He<sup>2</sup>, Xian Wu<sup>2</sup>, Yifei  
7 Dai<sup>3</sup>, Zihao Huang<sup>1</sup>, Ting Chen<sup>4</sup>, Shupeixiao<sup>1</sup>, Yan You<sup>5</sup>, Sheng Xiang<sup>6</sup>, Shaojun  
8 Zhang<sup>4</sup>, Jingkun Jiang<sup>4</sup>, and Ye Wu<sup>4</sup>

9 <sup>1</sup>College of Chemistry and Environmental Engineering, Shenzhen University, Shenzhen 518060, China

10 <sup>2</sup>State Environmental Protection Key Laboratory of Vehicle Emission Control and Simulation, Chinese  
11 Research Academy of Environmental Sciences, Beijing 100012, China

12 <sup>3</sup>Institute for Advanced Study, Shenzhen University, Shenzhen 518060, China

13 <sup>4</sup>School of Environment, State Key Joint Laboratory of Environment Simulation and Pollution Control,  
14 Tsinghua University, Beijing 100084, China

15 <sup>5</sup>National Observation and Research Station of Coastal Ecological Environments in Macao, Macao  
16 Environmental Research Institute, Macau University of Science and Technology, Macao SAR 999078,  
17 China

18 <sup>6</sup>State Key Laboratory of Pollution Control and Resource Reuse, Tongji University, Shanghai, China  
19 200092, China

20 *Correspondence to:* Xuan Zheng (x-zheng11@szu.edu.cn)

21

22

23 **Summary of the Supporting Information:**

24 Pages: 6

25 Supplementary Table: 1

26 Supplementary Figures: 6

27

**Table S1. The list of 120 external standard curves used in this study.**

| No. | Groups    | Name              | Molecular Formula | Cas No.    | R <sup>2</sup> |
|-----|-----------|-------------------|-------------------|------------|----------------|
| 1   | Alkane    | Heptane           | C7H16             | 142-82-5   | 0.973          |
| 2   | Alkane    | Octane            | C8H18             | 111-65-9   | 0.984          |
| 3   | Alkane    | Nonane            | C9H20             | 111-84-2   | 0.996          |
| 4   | Alkane    | Decane            | C10H22            | 124-18-5   | 0.995          |
| 5   | Alkane    | Undecane          | C11H24            | 1120-21-4  | 0.992          |
| 6   | Alkane    | Dodecane          | C12H26            | 112-40-3   | 0.973          |
| 7   | Alkane    | Tridecane         | C13H28            | 629-50-5   | 0.975          |
| 8   | Alkane    | Tetradecane       | C14H30            | 629-59-4   | 0.985          |
| 9   | Alkane    | Pentadecane       | C15H32            | 629-62-9   | 0.987          |
| 10  | Alkane    | Hexadecane        | C16H34            | 544-76-3   | 0.988          |
| 11  | Alkane    | heptadecane       | C17H36            | 629-78-7   | 0.975          |
| 12  | Alkane    | Octadecane        | C18H38            | 593-45-3   | 0.969          |
| 13  | Alkane    | Nonadecane        | C19H40            | 629-92-5   | 0.987          |
| 14  | Alkane    | Eicosane          | C20H42            | 112-95-8   | 0.961          |
| 15  | Alkane    | Heneicosane       | C21H44            | 629-94-7   | 0.962          |
| 16  | Alkane    | Docosane          | C22H46            | 629-97-0   | 0.976          |
| 17  | Alkane    | Tricosane         | C23H48            | 638-67-5   | 0.971          |
| 18  | Alkane    | Tetracosane       | C24H50            | 646-31-1   | 0.973          |
| 19  | Alkane    | Pentacosane       | C25H52            | 629-99-2   | 0.995          |
| 20  | Alkane    | Hexacosane        | C26H54            | 630-01-3   | 0.990          |
| 21  | Alkane    | Heptacosane       | C27H56            | 593-49-7   | 0.977          |
| 22  | Alkane    | Octacosane        | C28H58            | 630-02-4   | 0.982          |
| 23  | Alkane    | Nonacosane        | C29H60            | 630-03-5   | 0.972          |
| 24  | Alkane    | Triacontane       | C30H62            | 638-68-6   | 0.963          |
| 25  | Alkane    | Hentriacontane    | C31H64            | 630-04-6   | 0.971          |
| 26  | Alkane    | Dotriacontane     | C32H66            | 544-85-4   | 0.956          |
| 27  | Alkane    | Tritriacontane    | C33H68            | 630-05-7   | 0.959          |
| 28  | Alkane    | Tetratriacontane  | C34H70            | 14167-59-0 | 0.957          |
| 29  | Alkane    | Pentatriacontane  | C35H72            | 630-07-9   | 0.989          |
| 30  | Alkane    | Hexatriacontane   | C36H74            | 630-06-8   | 0.980          |
| 31  | Alkane    | Heptatriacontane  | C37H76            | 7194-84-5  | 0.989          |
| 32  | Alkene    | Octene            | C8H16             | 111-66-0   | 0.992          |
| 33  | Alkene    | Decene            | C10H20            | 872-05-9   | 0.982          |
| 34  | Alkene    | Dodecene          | C12H24            | 112-41-4   | 0.959          |
| 35  | Alkene    | Tetradecene       | C14H28            | 1120-36-1  | 0.976          |
| 36  | Alkene    | Hexadecene        | C16H32            | 629-73-2   | 0.985          |
| 37  | Alkene    | Octadecene        | C18H36            | 112-88-9   | 0.986          |
| 38  | Alkene    | Eicosene          | C20H40            | 3452-07-1  | 0.988          |
| 39  | Alkene    | Docosene          | C22H44            | 1599-67-3  | 0.987          |
| 40  | Alkyl-PAH | Methylnaphthalene | C11H10            | 90-12-0    | 0.997          |
| 41  | Acid      | Isobutyric Acid   | C4H8O2            | 79-31-2    | 0.989          |

| No. | Groups      | Name                   | Molecular Formula | Cas No.    | R <sup>2</sup> |
|-----|-------------|------------------------|-------------------|------------|----------------|
| 42  | Acid        | 2-Methyl butyric acid  | C5H10O2           | 116-53-0   | 0.986          |
| 43  | Acid        | Tetradecanoic acid     | C11H22O2          | 544-63-8   | 0.981          |
| 44  | Acid        | heptadecanoic acid     | C14H28O2          | 506-12-7   | 0.984          |
| 45  | Acid        | Undecanoic acid        | C17H34O2          | 112-37-8   | 0.984          |
| 46  | Alcohol     | Decanol                | C10H22O           | 112-30-1   | 0.982          |
| 47  | Alcohol     | Tridecanol             | C13H28O           | 26248-42-0 | 0.987          |
| 48  | Alcohol     | Hexadecanol            | C16H34O           | 36653-82-4 | 0.961          |
| 49  | Alcohol     | Nonadecanol            | C19H40O           | 1454-84-8  | 0.953          |
| 50  | Alcohol     | Docosanol              | C22H46O           | 661-19-8   | 0.994          |
| 51  | Aldehyde    | Valeraldehyde          | C5H10O            | 110-62-3   | 0.966          |
| 52  | Aldehyde    | 1-Pentanecarbaldehyde  | C6H12O            | 66-25-1    | 0.996          |
| 53  | Aldehyde    | Octanal                | C8H16O            | 124-13-0   | 0.995          |
| 54  | Aldehyde    | Decylaldehyde          | C10H20O           | 112-31-2   | 0.994          |
| 55  | Aldehyde    | Dodecanal              | C12H24O           | 112-54-9   | 0.957          |
| 56  | Aldehyde    | Tetradecanal           | C14H28O           | 124-25-4   | 0.978          |
| 57  | Aldehyde    | Hexadecanal            | C16H32O           | 629-80-1   | 0.955          |
| 58  | Aldehyde    | Octadecanone           | C18H36O           | 638-66-4   | 0.968          |
| 59  | Aldehyde    | Icosanal               | C20H40O           | 2400-66-0  | 0.959          |
| 60  | Aldehyde    | Docosanal              | C22H44O           | 57402-36-5 | 0.952          |
| 61  | Alkyl-PAH   | Ethyl-naphthalene      | C12H12            | 1127-76-0  | 0.971          |
| 62  | Amide       | Acetamide              | C2H5NO            | 60-35-5    | 1.000          |
| 63  | Amide       | Propanamide            | C3H7NO            | 79-05-0    | 0.960          |
| 64  | Amide       | N,N-Dibutylformamide   | C9H19NO           | 761-65-9   | 0.952          |
| 65  | Amine       | Triethylamine          | C6H15N            | 121-44-8   | 0.986          |
| 66  | Amine       | Aniline                | C6H7N             | 62-53-3    | 0.981          |
| 67  | Amine       | 2-Aminoaniline         | C6H8N2            | 95-54-5    | 0.997          |
| 68  | Amine       | Dibutylamine           | C8H19N            | 111-92-2   | 0.990          |
| 69  | Amine       | 1-Naphthalenamine      | C10H9N            | 134-32-7   | 0.962          |
| 70  | Amine       | 4-Biphenylamine        | C12H11N           | 92-67-1    | 0.994          |
| 71  | Aromatic    | Ethylbenzene           | C8H10             | 100-41-4   | 0.996          |
| 72  | Aromatic    | p-xylene               | C8H10             | 106-42-3   | 0.993          |
| 73  | Aromatic    | o-xylene               | C8H10             | 95-47-6    | 0.993          |
| 74  | Aromatic    | Isopropylbenzene       | C9H12             | 98-82-8    | 0.995          |
| 75  | Aromatic    | 4-Ethyltoluene         | C9H12             | 622-96-8   | 0.982          |
| 76  | Aromatic    | 1,3,5-trimethylbenzene | C9H12             | 108-67-8   | 0.993          |
| 77  | Aromatic    | p-Cymene               | C10H14            | 99-87-6    | 0.966          |
| 78  | Aromatic    | butyl-benzene          | C10H14            | 104-51-8   | 0.993          |
| 79  | Aromatic    | pentyl-benzene         | C11H16            | 538-68-1   | 0.974          |
| 80  | Aromatic    | hexyl-benzene          | C12H18            | 1077-16-3  | 0.973          |
| 81  | Cycloalkane | Ethyl-cyclohexane      | C8H16             | 1678-91-7  | 0.950          |
| 82  | Cycloalkane | Butyl-cyclohexane      | C10H20            | 1678-93-9  | 0.986          |
| 83  | Cycloalkane | Hexyl-cyclohexane      | C12H24            | 4292-75-5  | 0.968          |

| No. | Groups      | Name                          | Molecular Formula | Cas No.    | R <sup>2</sup> |
|-----|-------------|-------------------------------|-------------------|------------|----------------|
| 84  | Cycloalkane | Octyl-cyclohexane             | C14H28            | 1795-15-9  | 0.950          |
| 85  | Cycloalkane | Decyl-cyclohexane             | C16H32            | 1795-16-0  | 0.955          |
| 86  | Cycloalkane | Dodecyl-cyclohexane           | C18H36            | 1795-17-1  | 0.974          |
| 87  | Cycloalkane | Tetradecyl-cyclohexane        | C20H40            | 1795-18-2  | 0.969          |
| 88  | Cycloalkane | Hexadecyl-cyclohexane         | C22H44            | 6812-38-0  | 0.979          |
| 89  | Ester       | Butyl acetate                 | C6H12O2           | 123-86-4   | 0.979          |
| 90  | Ester       | Isoamyl Acetate               | C7H14O2           | 123-92-2   | 0.995          |
| 91  | Ester       | Amyl Acetate                  | C7H14O2           | 628-63-7   | 0.973          |
| 92  | Furan       | Furan                         | C4H4O             | 110-00-9   | 0.961          |
| 93  | Ketone      | 2-Pentanone                   | C5H10O2           | 107-87-9   | 0.990          |
| 94  | Ketone      | 3-Heptanone                   | C7H14O            | 106-35-4   | 0.995          |
| 95  | Ketone      | 2-Nonanone                    | C9H18O            | 821-55-6   | 0.984          |
| 96  | Ketone      | 2-Dodecanone                  | C12H24O           | 6175-49-1  | 0.972          |
| 97  | Ketone      | Pentadecanone                 | C15H30O           | 2345-28-0  | 0.986          |
| 98  | Oxy-PAH     | 1,4-naphthoquinone            | C10H6O2           | 130-15-4   | 0.994          |
| 99  | Oxy-PAH     | 1-naphthaldehyde              | C11H8O            | 66-77-3    | 0.982          |
| 100 | Oxy-PAH     | 9,10-anthraquinone            | C14H8O2           | 84-65-1    | 0.992          |
| 101 | Oxy-PAH     | benzo[a]anthracene-7,12-dione | C18H10O2          | 2498-66-0  | 0.983          |
| 102 | PAH         | Indene                        | C9H8              | 95-13-6    | 0.990          |
| 103 | PAH         | Naphthalene                   | C10H8             | 91-20-3    | 0.997          |
| 104 | PAH         | Acenaphthylene                | C12H8             | 208-96-8   | 0.996          |
| 105 | PAH         | Acenaphthene                  | C12H10            | 83-32-9    | 0.989          |
| 106 | PAH         | Fluorene                      | C13H10            | 86-73-7    | 0.997          |
| 107 | PAH         | Phenanthrene                  | C14H10            | 85-01-8    | 0.994          |
| 108 | PAH         | Anthracene                    | C14H10            | 120-12-7   | 0.992          |
| 109 | PAH         | Pyrene                        | C16H10            | 129-00-0   | 0.992          |
| 110 | PAH         | Benz[a]anthracene             | C18H12            | 56-55-3    | 0.973          |
| 111 | PAH         | Chrysene                      | C18H12            | 218-01-9   | 0.973          |
| 112 | PAH         | Benzo[b]fluoranthene          | C20H12            | 205-99-2   | 0.961          |
| 113 | PAH         | Benzo[k]fluoranthene          | C20H12            | 207-08-9   | 0.983          |
| 114 | PAH         | Benzo[a]pyrene                | C20H12            | 50-32-8    | 0.967          |
| 115 | PAH         | Indeno[1,2,3-cd]fluoranthene  | C22H12            | 193-39-5   | 0.991          |
| 116 | Pinene      | (+)-alpha-Pinene              | C10H16            | 7785-70-8  | 0.950          |
| 117 | Pinene      | β-Pinene                      | C10H16            | 18172-67-3 | 0.991          |
| 118 | Polyphenyls | Biphenyl                      | C12H10            | 92-52-4    | 0.952          |
| 119 | Polyphenyls | p-terphenyl                   | C18H14            | 92-94-4    | 0.967          |
| 120 | Polyphenyls | p-quaterphenyl                | C24H18            | 135-70-6   | 0.987          |

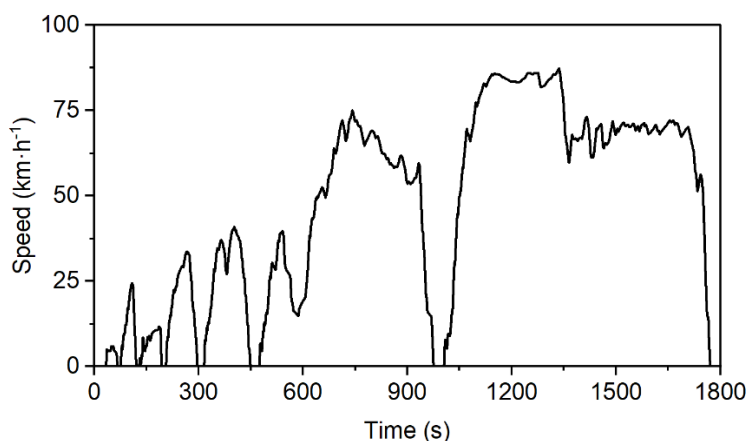

29

30 **Figure S1. CHTC-TT test cycle for tractor trailers.** The cycle lasts 1800 s, with the first 473 s as  
 31 phase 1 and the last 1327 s as phase 2. The total driving distance is about 23 km, and the maximum  
 32 speed is 88 km·h<sup>-1</sup>.

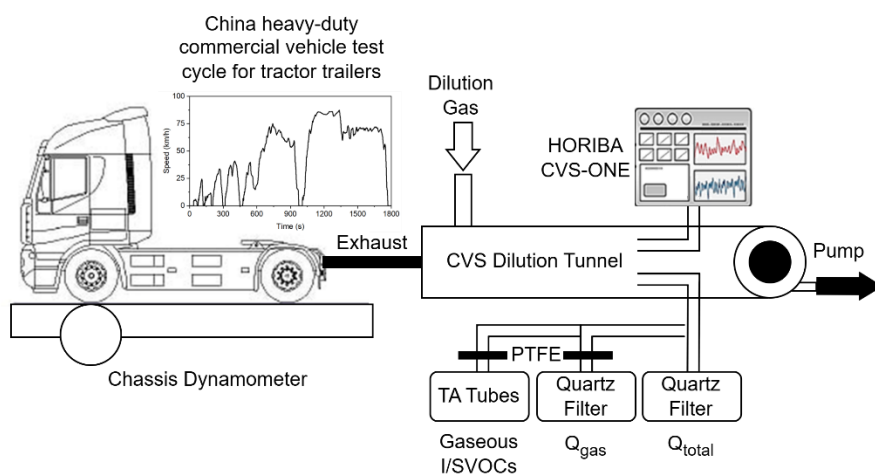

33

34 **Figure S2. A schematic of the sampling systems.**

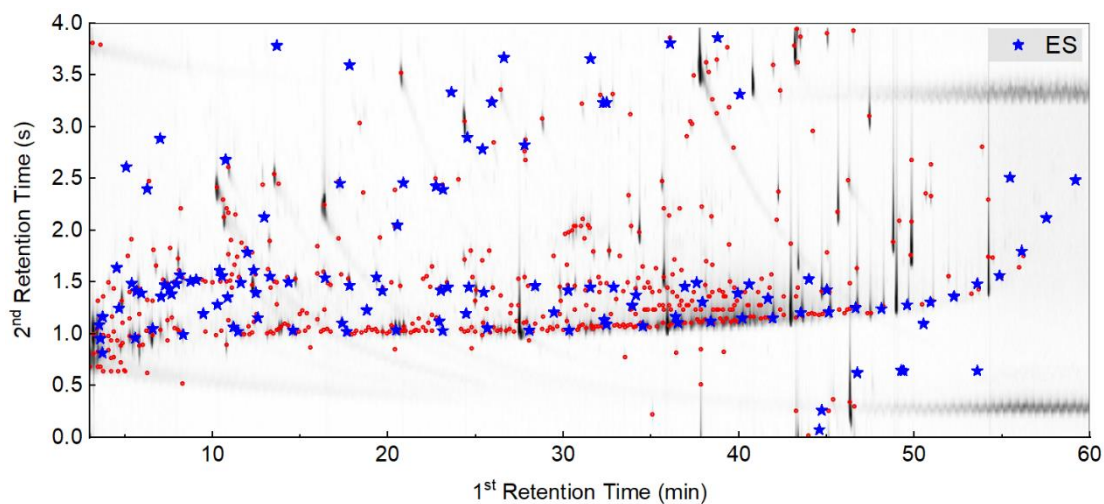

35

36 **Figure S3. Actual GC×GC chromatogram and sample chromatographic peaks (the red dots).** The  
 37 blue stars represent all ES used in this study including n-alkanes, PAHs, carbonyls, etc. All their

38 detailed information was listed in Table S1.

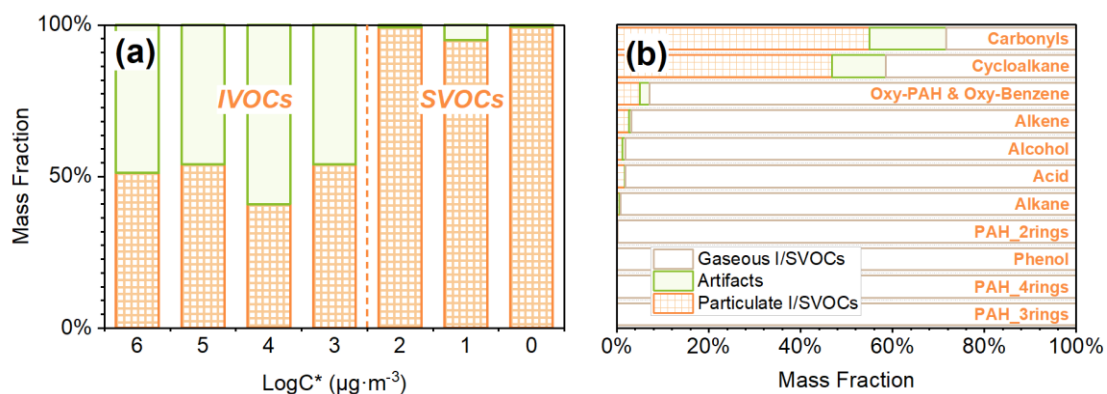

39  
40 **Figure S4.(a)** The mass fraction of artifacts and particulate I/SVOCs divided by C\* captured by  
41 **quartz. (b)** Gas-particle partition and artifacts of various organic compound groups.

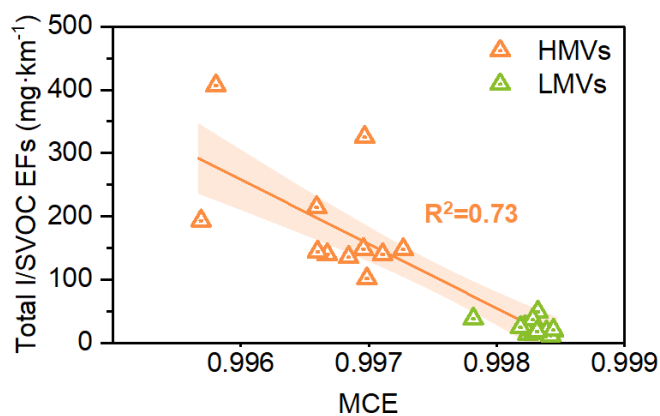

42  
43 **Figure S5.** The linear correlation between total I/SVOC EFs and MCE.

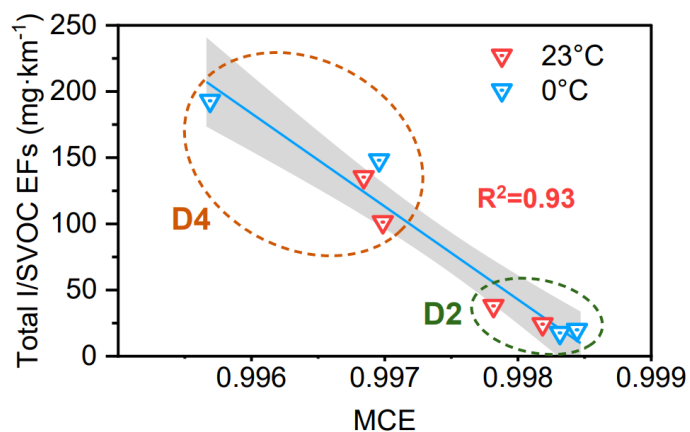

44  
45 **Figure S6.** The linear correlation between hot-start cycle I/SVOC EFs and MCE of LMV (D2) and  
46 **HMV (D4)** at different ambient temperatures.
