# Supplementary material for: Emissions of Intermediate- and Semi-Volatile Organic Compounds (I/SVOCs) from Different Cumulative Mileage Diesel Vehicles under Various Ambient Temperatures
Source: Copernicus journal article supplement (doi:10.5194/egusphere-2024-3290), 2024-11-04
Supplement: Supplementary file [file egusphere-2024-3290-AC1-supplement.pdf]

1 Point-to-point responses to review comments (egosphere-2024-3290)

2 Title: Emissions of Intermediate- and Semi-Volatile Organic Compounds (I/SVOCs) from Different  
3 Cumulative Mileage Diesel Vehicles under Various Ambient Temperatures

4 Review of Shuwen Guo et al.

5 In the current study, gaseous and particulate I/SVOCs emitted from four HDDVs were analyzed  
6 using GC×GC-MS. The emission factors as well as the composition of I/SVOCs were reported.  
7 Overall, the experiments were nicely done and the data are well analyzed. The current contribution  
8 is a welcome addition to the field. There are several places in the paper are a bit obscure as detailed  
9 in the comments below. Beyond these, I do not see any major obstacles to publication.

10 Response:

11 We thank the reviewer for supporting our work, and we provide below a point-by-point response  
12 to the individual comments.

13 Specific comments:

14 (1) The experiments were well organized. My general question is the innovation of the current study.  
15 The I/SVOC emissions as well as their compositions from heavy diesel vehicles have been widely  
16 reported, including the studies from their own group. Any new findings that the authors would like  
17 to highlight in the current one?

18 Response:

19 Thanks for the comment. We highlight the findings below:

20 1) This study discussed the differences in I/SVOC emissions of heavy-duty diesel vehicles  
21 (HDDVs) with different cumulative mileage and calculated the emission deterioration  
22 coefficient, which has been overlooked in previous studies (Chang et al., 2022; He et al., 2022a,  
23 b; Liu et al., 2021). We found that overlooking the I/SVOC emission degradation will result in  
24 a more than three-fold underestimation of the total I/SVOC emissions of China V HDDVs in  
25 China.

26 2) The low ambient temperatures would lead to more I/SVOC emissions for high-mileage vehicles  
27 (HMTVs), but no significant impact on low-mileage vehicles (LMVs). This has also been less  
28 focused on in the past.

29 3) We discussed the certain linear correlation ( $R^2 = 0.73$ ) between I/SVOC EFs and modified  
30 combustion efficiency (MCE), which reveals the increase of I/SVOC emissions above is caused  
31 by a decrease in engine combustion efficiency.

32 (2) Line 24: “Compounds such as phenol, .... appeared only in HMTV emissions”. These are  
33 compounds that are widely observed in vehicle emissions. Any reason for their disappearance in  
34 LMV emission? Are there any potential artifacts in the sample analysis?

35 Response:

36 Thanks for the comment. We did observe chromatographic peaks of phenols from LMV exhaust,  
37 but their peak areas were significantly smaller compared to those observed in HMTVs and were

38 indistinguishable from those in background samples. Phenols reported in previous studies were also  
39 emitted by high cumulative mileage vehicles. For instance, He et al. (2022) investigated HDDVs  
40 with a service duration ranging from 2 to 6 years. Zhang et al. (2024) tested I/SVOCs from HDDVs  
41 with service duration ranging from 1 to 6 years and found weak phenol signals for newer ones. As  
42 vehicle age and mileage increase, engine combustion efficiency decreases, leading to higher  
43 organic emissions in I/SVOCs and thus phenol concentrations above background levels to be  
44 detected.

45 (3) Line 179: “Oxy-PAH&Oxy-benzene”, I don’t think the abbreviations were pre-defined. Also,  
46 what compounds specifically do they represent? I noticed the authors also separately classify  
47 “phenol” instead of grouping them into “Oxy-benzene”.

48 Response:

49 Thanks for the comment. Similar abbreviations have appeared in our previous research papers (He  
50 et al., 2022a, b 2024), and we apologize for the author's oversight in not specifying the types of  
51 organic compounds covered by the abbreviations again in the manuscript of this study. Oxy-PAH  
52 & Oxy-benzene represent all organic compounds containing benzene rings and oxygen-containing  
53 groups, except for phenols whose hydroxyl group is directly connected to the benzene ring. We  
54 supplement a detailed description of all organic category names as SI-1 in supporting information  
55 (SI).

56 **“SI-1. Description of all organic category names.**

57 Alkane: n-alkane and i-alkane. Alcohol: aliphatic alcohol. Phenol: organics containing one benzene  
58 ring and a hydrocarbon group directly attached to the benzene ring. Carbonyls: aliphatic ketone and  
59 aliphatic aldehyde. Acid: aliphatic acid. Oxy-PAH & Oxy-benzene: organic compounds containing  
60 benzene rings and oxygen-containing groups, except for phenols whose hydroxyl group is directly  
61 connected to one benzene ring. PAH\_2rings: PAH with 2 benzene rings. PAH\_3rings: PAH with 3  
62 benzene rings. PAH\_4rings: PAH with 4 benzene rings. Alkene: organics containing carbon double  
63 bond(s) without any other function groups. Cycloalkane: organics containing a saturated carbon  
64 ring without any other function groups.

65 ”

66 Please refer to lines 27-35 in the SI for details.

67 (4) Line 190: the emission factors of ISVOCs between LMV and HMV differs quite a lot according  
68 to Figure 2a. And according to Figure 3, the fractional contributions from different components are  
69 also different for HMV and LMV. Hence, I’m not sure it is appropriate to present the average  
70 volatility distributions of I/SVOCs from the entire fleet. Could Figure 1 be separated into LMV and  
71 HMV?

72 Response:

73 Suggestion taken. We divided Figure 1 into LMV and HMV results for plotting, rather than taking  
74 the average of the two, as shown in the figure below. Figure (a) was the average volatility  
75 distribution of I/SVOCs from the LMVs, and (b) from HMVs. Different colored bars represent

76 different organic groups. The highest I/SVOC EFs for LMVs were in bin 3 and bin 2, reaching 5  
 77  $\text{mg}\cdot\text{km}^{-1}$  and 4  $\text{mg}\cdot\text{km}^{-1}$ ; but for HMs were in bin 6 and bin 5, reaching 37  $\text{mg}\cdot\text{km}^{-1}$  and 31  $\text{mg}\cdot\text{km}^{-1}$   
 78 <sup>1</sup>, respectively. The I/SVOCs they emitted are mainly IVOCs.

79 The information in this modified figure overlapped with Figure 3 in the main context (line 253),  
 80 and thus this modified figure was placed in the SI as Fig. S4. The original Fig. 1 in line 190 of the  
 81 manuscript has been deleted, and other figure numbers and figure references in the main text have  
 82 been modified. The SI was modified as follows:

83 “

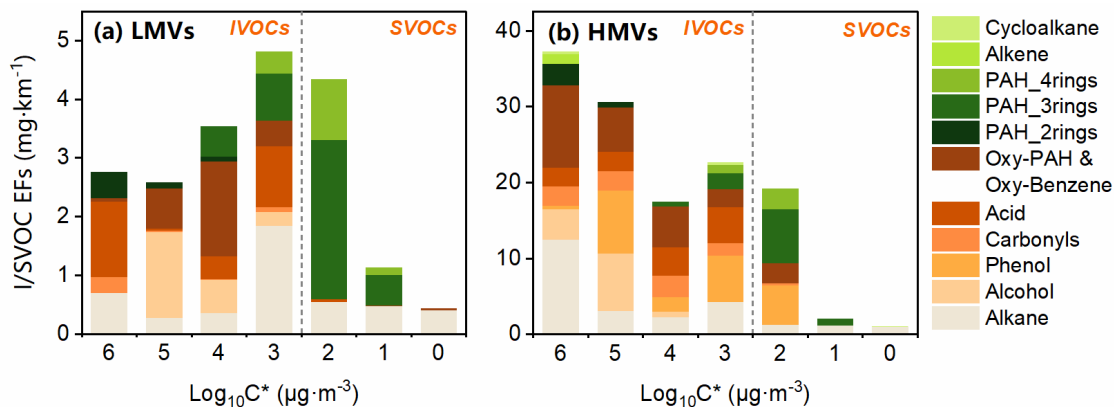

84

85 Fig. S4. The average volatility distribution of I/SVOCs from the (a) LMVs and (b) HMs.  
 86 Different colored bars represent different organic groups.”

87 Please refer to lines 76-79 in the SI for details.

88 (5) Line 225: How many sets of the tests were performed? Does each data point on Figure 2b  
 89 represents the average emission factor for each entire 1800s test cycle? Also, I hesitate to agree that  
 90 gaseous I/SVOCs show good correlation with THC because the datapoints on Figure 2b  
 91 concentrates at two ends of the fitted line, which might affect the reliability of the linear regression.  
 92 Any more evidence on this point? Or any other supporting references?

93 Response:

94 Thanks for the comment. We performed ten sets of tests and two or three parallel tests were  
 95 conducted, as shown in the table below, which has been supplemented in the SI. Each data point on  
 96 Figure 2b represents the EF for each entire 1800s test cycle.

97 Previous studies on vehicle exhaust emissions have reported a linear correlation between I/SVOC  
 98 and THC (or nonmethane hydrocarbons, NMHCs). For example, Zhao et al. (2015, 2016) reported  
 99 a stronger correlation between total I/SVOCs and NMHCs ( $R^2 = 0.92-0.98$ ) emitted from motor  
 100 vehicles. The strong correlation between total I/SVOCs and THC ( $R^2 = 0.78-0.87$ ) was also found  
 101 by Tang et al. (2021). Their linear correlation and ratio have also been used to estimate the I/SVOC  
 102 emission inventory when no detailed I/SVOC measurement data are available (Zhang et al., 2024;  
 103 Zhao et al., 2022). For instance, Zhao et al. (2022) used the EF ratios of IVOCs to NMHCs of diesel

104 vehicles calculated by previous studies to estimate the IVOC emission inventory for mobile sources  
 105 in China.

106 “Table S1. Sets of test cycles.

| <b>NO.</b> | <b>Vehicle ID</b> | <b>Ambient Temperature</b> | <b>Cold- or Hot-start Cycle</b> | <b>Repetitions</b> |
|------------|-------------------|----------------------------|---------------------------------|--------------------|
| <b>1</b>   | D1                | 23°C                       | Cold-start cycle                | 2                  |
| <b>2</b>   | D1                | 23°C                       | Hot-start cycle                 | 2                  |
| <b>3</b>   | D2                | 23°C                       | Cold-start cycle                | 2                  |
| <b>4</b>   | D2                | 23°C                       | Hot-start cycle                 | 2                  |
| <b>5</b>   | D2                | 0°C                        | Hot-start cycle                 | 2                  |
| <b>6</b>   | D3                | 23°C                       | Cold-start cycle                | 3                  |
| <b>7</b>   | D3                | 23°C                       | Hot-start cycle                 | 3                  |
| <b>8</b>   | D4                | 23°C                       | Cold-start cycle                | 3                  |
| <b>9</b>   | D4                | 23°C                       | Hot-start cycle                 | 3                  |
| <b>10</b>  | D4                | 0°C                        | Hot-start cycle                 | 2                  |

107 Please refer to lines 61 in the SI for details.

108

109 (6) The influence of temperature on emission is interesting. What are the variations of other  
 110 pollutants with the changes in temperature, i.e., THC, NOx, CO, etc?

111 Response:

112 We did find that the emissions of other pollutants from HMV were also affected by low ambient  
 113 temperature, but this part was not mentioned in the manuscript as it is not related to the title of the  
 114 article. The low temperature caused the average EFs of THC (NOx, CO) to increase from 289  
 115 mg·km<sup>-1</sup> (2629 mg·km<sup>-1</sup>, 359 mg·km<sup>-1</sup>) to 302 mg·km<sup>-1</sup> (3555 mg·km<sup>-1</sup>, 404 mg·km<sup>-1</sup>). However, the  
 116 reasons for their increase in EFs were different. THC and CO are the by-products of incomplete  
 117 combustion of diesel, and thus their EFs are directly related to MCE. The EF of NOx is related to  
 118 the treatment efficiency of the selective catalytic reduction (SCR) system, whose ammonia aqueous  
 119 solution may partially solidify at 0°C thereby reducing the reaction efficiency of NOx in SCR. The  
 120 same emission change pattern of these conventional pollutants was found in LMV. The detailed  
 121 data is shown in the table below, which has been supplemented in SI.

122 “Table S3. Average THC, NOx, and CO EFs for LMV and HMV, respectively.

| <b>Vehicle</b> | <b>Test Cycle</b> | <b>THC (mg·km<sup>-1</sup>)</b> | <b>NOx (mg·km<sup>-1</sup>)</b> | <b>CO (mg·km<sup>-1</sup>)</b> |
|----------------|-------------------|---------------------------------|---------------------------------|--------------------------------|
| <b>LMV</b>     | Hot_23°C          | 35                              | 6951                            | 600                            |
| <b>(D2)</b>    | Hot_0°C           | 38                              | 8048                            | 657                            |
| <b>HMV</b>     | Hot_23°C          | 289                             | 2629                            | 359                            |
| <b>(D4)</b>    | Hot_0°C           | 302                             | 3555                            | 404                            |

123 ”

124 Please refer to lines 65 in the SI for details.

125

126 (7) The overall presentation is acceptable, but English could do with improvement in places.

127 Response:

128 Thanks for the comment. We have polished the English expression of the entire text again. Taking  
129 the modifications listed in the table below for example:

| <b>Original</b> |                                                                                                                                                                                                                                                                                                                                                                                                                                                              | <b>Modified</b> |                                                                                                                                                                                                                                                                                   |
|-----------------|--------------------------------------------------------------------------------------------------------------------------------------------------------------------------------------------------------------------------------------------------------------------------------------------------------------------------------------------------------------------------------------------------------------------------------------------------------------|-----------------|-----------------------------------------------------------------------------------------------------------------------------------------------------------------------------------------------------------------------------------------------------------------------------------|
| <i>Line</i>     | <i>Text</i>                                                                                                                                                                                                                                                                                                                                                                                                                                                  | <i>Line</i>     | <i>Text</i>                                                                                                                                                                                                                                                                       |
| 49              | These variations underscore the need for a more precise assessment of diesel vehicle I/SVOC emission factors (EFs).                                                                                                                                                                                                                                                                                                                                          | 47              | These discrepancies highlight the urgent need for a more precise assessment of diesel vehicle I/SVOC emission factors (EFs).                                                                                                                                                      |
| 52              | Furthermore, many regions in China experience temperatures of 0°C or lower during the autumn and winter. Consequently, HDDVs operating under such low-temperature conditions may exhibit different emission characteristics compared to those under normal temperatures (e.g., 23°C). This underscores the importance of examining the variations in I/SVOC emissions and exhaust component distribution from HDDVs across different temperature conditions. | 50              | Given that many regions in China experience temperatures below 0°C during winter, evaluating how HDDVs operate under such conditions is critical in I/SVOC emissions and exhaust component distribution across different temperature conditions.                                  |
| 61              | In the study of Zhao et al (2015), approximately 80% of I/SVOCs emitted by diesel vehicles remain unresolved by GC-MS, reckoned as UCM. Moreover, due to the variability in the response signals detected by mass spectrometry for different complex organic compounds (He et al., 2022b), the lack of detailed component information introduces significant uncertainties in I/SVOC quantification and prediction of SOA formation potential (SOAFP).       | 58              | For example, Zhao et al (2015) reported that 80% of I/SVOCs emitted by diesel vehicles were classified as UCM. This lack of detailed chemical information introduces uncertainties in I/SVOC quantification and prediction of SOA formation potential (SOAFP) (He et al., 2022b). |
| 182             | The alkane proportion was lower but O-I/SVOC proportion was higher than that in previous studies (alkane: 37% to 66%, O-I/SVOCs: 20% to 27%) (He et al., 2022b; Zhang et al., 2024a).                                                                                                                                                                                                                                                                        | 180             | The proportion of O-I/SVOCs was notably higher in this study compared to previous research, where alkanes typically accounted for 37% to 66% and O-I/SVOCs for 20% to 27% (He et al., 2022b; Zhang et al., 2024a).                                                                |

130 **References:**

- 131 Chang, X., Zhao, B., Zheng, H., Wang, S., Cai, S., Guo, F., Gui, P., Huang, G., Wu, D., Han, L.,  
132 Xing, J., Man, H., Hu, R., Liang, C., Xu, Q., Qiu, X., Ding, D., Liu, K., Han, R., Robinson, A. L.,  
133 and Donahue, N. M.: Full-volatility emission framework corrects missing and underestimated  
134 secondary organic aerosol sources, *One Earth*, 5, 403–412,  
135 <https://doi.org/10.1016/j.oneear.2022.03.015>, 2022.
- 136 He, X., Zheng, X., Zhang, S., Wang, X., Chen, T., Zhang, X., Huang, G., Cao, Y., He, L., Cao, X.,  
137 Cheng, Y., Wang, S., and Wu, Y.: Comprehensive characterization of particulate intermediate-  
138 volatility and semi-volatile organic compounds (I/SVOCs) from heavy-duty diesel vehicles using  
139 two-dimensional gas chromatography time-of-flight mass spectrometry, *Atmos. Chem. Phys.*, 22,  
140 13935–13947, <https://doi.org/10.5194/acp-22-13935-2022>, 2022a.
- 141 He, X., Zheng, X., You, Y., Zhang, S., Zhao, B., Wang, X., Huang, G., Chen, T., Cao, Y., He, L.,  
142 Chang, X., Wang, S., and Wu, Y.: Comprehensive chemical characterization of gaseous I/SVOC  
143 emissions from heavy-duty diesel vehicles using two-dimensional gas chromatography time-of-  
144 flight mass spectrometry, *Environ. Pollut.*, 305, 119284,  
145 <https://doi.org/10.1016/j.envpol.2022.119284>, 2022b.
- 146 He, X., Zheng, X., Guo, S., Zeng, L., Chen, T., Yang, B., Xiao, S., Wang, Q., Li, Z., You, Y., Zhang,  
147 S., and Wu, Y.: Automated compound speciation, cluster analysis, and quantification of organic  
148 vapors and aerosols using comprehensive two-dimensional gas chromatography and mass  
149 spectrometry, *Atmos. Chem. Phys.*, 24, 10655–10666, <https://doi.org/10.5194/acp-24-10655-2024>,  
150 2024.
- 151 Liu, Y., Li, Y., Yuan, Z., Wang, H., Sha, Q., Lou, S., Liu, Y., Hao, Y., Duan, L., Ye, P., Zheng, J., Yuan,  
152 B., and Shao, M.: Identification of two main origins of intermediate-volatility organic compound  
153 emissions from vehicles in China through two-phase simultaneous characterization, *Environmental*  
154 *Pollution*, 281, 117020, <https://doi.org/10.1016/j.envpol.2021.117020>, 2021.
- 155 Tang, R., Lu, Q., Guo, S., Wang, H., Song, K., Yu, Y., Tan, R., Liu, K., Shen, R., Chen, S., Zeng, L.,  
156 Jorga, S. D., Zhang, Z., Zhang, W., Shuai, S., and Robinson, A. L.: Measurement report: Distinct  
157 emissions and volatility distribution of intermediate-volatility organic compounds from on-road  
158 Chinese gasoline vehicles: implication of high secondary organic aerosol formation potential,  
159 *Atmos. Chem. Phys.*, 21, 2569–2583, <https://doi.org/10.5194/acp-21-2569-2021>, 2021.
- 160 Zhang, Z., Man, H., Zhao, J., Huang, W., Huang, C., Jing, S., Luo, Z., Zhao, X., Chen, D., He, K.,  
161 and Liu, H.: VOC and IVOC emission features and inventory of motorcycles in China, *Journal of*  
162 *Hazardous Materials*, 469, 133928, <https://doi.org/10.1016/j.jhazmat.2024.133928>, 2024.
- 163 Zhao, Y., Nguyen, N. T., Presto, A. A., Hennigan, C. J., May, A. A., and Robinson, A. L.: Intermediate  
164 volatility organic compound emissions from on-road diesel vehicles: chemical composition,  
165 emission factors, and estimated secondary organic aerosol production, *Environ. Sci. Technol.*, 49,  
166 11516–11526, <https://doi.org/10.1021/acs.est.5b02841>, 2015.

- 167 Zhao, Y., Nguyen, N. T., Presto, A. A., Hennigan, C. J., May, A. A., and Robinson, A. L.: Intermediate  
168 volatility organic compound emissions from on-road gasoline vehicles and small off-road gasoline  
169 engines, *Environ. Sci. Technol.*, 50, 4554–4563, <https://doi.org/10.1021/acs.est.5b06247>, 2016.
- 170 Zhao, J., Qi, L., Lv, Z., Wang, X., Deng, F., Zhang, Z., Luo, Z., Bie, P., He, K., and Liu, H.: An  
171 updated comprehensive IVOC emission inventory for mobile sources in China, *Science of The Total  
172 Environment*, 851, 158312, <https://doi.org/10.1016/j.scitotenv.2022.158312>, 2022.
