# Supplementary material for: Emissions of Intermediate- and Semi-Volatile Organic Compounds (I/SVOCs) from Different Cumulative Mileage Diesel Vehicles under Various Ambient Temperatures
Source: Copernicus journal article supplement (doi:10.5194/egusphere-2024-3290), 2024-11-04
Supplement: Supplementary file [file egusphere-2024-3290-AC2-supplement.pdf]

1 Point-to-point responses to review comments (egusphere-2024-3290)

2 Title: Emissions of Intermediate- and Semi-Volatile Organic Compounds (I/SVOCs) from Different  
3 Cumulative Mileage Diesel Vehicles under Various Ambient Temperatures

4 Review of Shuwen Guo et al.

5 This manuscript investigates the gaseous and particulate I/SVOC emission factors (EFs) of high-  
6 mileage vehicles (HMTVs) and low-mileage vehicles (LMVs) under varying ambient temperatures  
7 using TD-GC×GC-MS. The authors provide a comprehensive analysis of the variations in emission  
8 factors and their chemical components, identifying a linear correlation between I/SVOC EFs and  
9 the modified combustion efficiency (MCE). The experimental methodology is thorough and  
10 reliable, and the findings present a significant advancement in understanding I/SVOC emissions  
11 from heavy-duty diesel vehicles (HDDVs). The results have practical implications, particularly for  
12 researchers developing I/SVOC emission inventories and secondary organic aerosol (SOA)  
13 prediction. Overall, I recommend accepting this manuscript following minor revisions.

14 **Response:**

15 Sincerely thanks for the positive comments. We have carefully revised the manuscript according to  
16 the specific comments.

17 Specific comments:

18 1. In section 2.1, the authors describe the information of the four in-use HDDVs. But the vehicle  
19 brand and the engine model of the HDDVs, which are closely related to the vehicle emission  
20 are not given. The related information should be given, and some discussion about the  
21 uncertainty caused by these differences and the aging of the engine should be included in the  
22 manuscript.

23 **Response:**

24 Thanks for the suggestion. We have modified Table 1 in the main text, which offers more  
25 information including the brand, the engine model, and the in-use duration to represent the aging  
26 of the engine. Also, the uncertainty caused by them has been discussed.

27 **“Table 1. Information on the test fleet**

| <b>Vehicle ID</b>                              | <b>D1</b> | <b>D2</b>  | <b>D3</b>   | <b>D4</b>   |
|------------------------------------------------|-----------|------------|-------------|-------------|
| <b>Emission Standard</b>                       | China V   | China V    | China V     | China V     |
| <b>Aftertreatment Devices</b>                  | SCR       | SCR        | SCR         | SCR         |
| <b>Brand</b>                                   | DONGFENG  | SINOTRUK   | DELONG      | DELONG      |
| <b>Engine Model</b>                            | dCi450-51 | MC13.54-50 | WP10.310E53 | WP10.310E53 |
| <b>In-use Duration</b>                         | 7 months  | 8 months   | 32 months   | 32 months   |
| <b>Cumulative Mileage (×10<sup>3</sup> km)</b> | 22.21     | 34.84      | 169.50      | 188.33      |

|                                               |       |       |      |      |
|-----------------------------------------------|-------|-------|------|------|
| <b>Gross Combined Weight Rating (GCWR, t)</b> | 48.8  | 48.8  | 41.8 | 41.8 |
| <b>Rated Power (kW)</b>                       | 309   | 397   | 228  | 228  |
| <b>Displacement (L)</b>                       | 11.12 | 12.42 | 9.73 | 9.73 |

28 ...

29 ...It should be noted that existing research primarily focuses on diesel vehicles with cumulative  
30 mileage below 200,000 km. Further experiments are necessary to determine whether I/SVOC  
31 emissions from designated HDDVs with over 200,000 km of mileage continue to increase linearly  
32 or stabilize. Also, the brand, engine models, GCWR, and displacement of the four HDDVs were  
33 slightly different (Table 1), which might bring some uncertainty to the emission analysis results  
34 (Zeng et al., 2024; Tolouei and Titheridge, 2009; Aosaf et al., 2022). Future studies should further  
35 consider the uncertainties brought by these factors.”

36 Please refer to lines 88 and 226-229 in the main text for details.

37 2. In Section 2.1, it is better to give the dilution ratio of the exhaust. In addition, was the temperature  
38 of the sampling pipe maintained as a certain level to reduce thermophoretic and condensational  
39 losses?

40 Response:

41 Thanks for the comment. The dilution ratio of the exhaust was about 40 of the exhaust. CVS is a  
42 constant temperature dilution system that stabilizes the airflow within the sampling channel at 25°C  
43 to reduce thermophoretic and condensational losses.

44 “Each CHTC-TT lasts 1800 seconds, with an average speed of 46.6 km·h<sup>-1</sup> and a maximum speed  
45 of 88 km·h<sup>-1</sup> (Fig. S1). When the vehicles were driven at the speed specified by the CHTC-TT on  
46 the dynamometer, the emitted exhaust from tailpipes was diluted in the constant volume sampler  
47 (CVS). The exhaust dilution ratio was about 40. The CVS system maintains the airflow of the  
48 diluted exhausts at 25°C to avoid thermophoretic and condensational losses. CO<sub>2</sub>, CO, total  
49 hydrocarbons (THC), and NO<sub>x</sub> from the diluted exhaust were detected by the real-time gas analyzer  
50 module (MEXA-7400HLE, HORIBA, Japan) provided by the CATARC, and a series of offline  
51 sampling test samples were also collected from the CVS.”

52 Please refer to lines 91-92 in the main text for details.

53 3. In Section 2.2, the authors describe the method to remove effects of absorption on the quartz  
54 filter when calculating the total I/SVOCs. The gas phase of I/SVOCs are collected after a PTFE  
55 filter, but the separation of gas and particle I/SVOCs after the PTFE may break the equilibrium  
56 of gas/particle I/SVOCs and lead to evaporation of particle I/SVOCs, which may overestimate  
57 the Q<sub>gas</sub>. It is better to provide some discussion on the uncertainty of this method.

58 Response:

59 Suggestion taken. We added the following text in line 105-110 to address this issue in the revised  
60 manuscript:

61 "...the total I/SVOC results in this paper were gaseous I/SVOCs collected by TA tubes plus  
62 particulate I/SVOCs collected by quartz filters after deducting artifacts (total I/SVOCs = TA + (1 -  
63 32%) × Q<sub>total</sub>). Notably, the gas phase of I/SVOCs was collected after passing through a PTFE filter,  
64 and the separation of gas and particle I/SVOCs beyond the PTFE filter may disrupt the equilibrium  
65 between them. Cheng et al. (2010) evaluated the collection artifacts of organic carbon using various  
66 quartz filter sampling methods and found that about 10% of the Q<sub>gas</sub> derived from volatilized  
67 particulate organic carbon by the sampling method used in this study. Therefore, the Q<sub>gas</sub> in this  
68 study may be slightly overestimated. The TA tubes were prebaked at 320°C for 2 hours..."

69 4. The sentence "...by He et al. (2022b)" in line 132 is missing a period at the end. Please correct  
70 this.

71 Response:

72 Thanks for pointing this out. The error here has been corrected. Please refer to line 131 in the main  
73 text.

74 5. Some phrases should use standard abbreviations. For instance, the phrase "...as shown in Figure  
75 1" in line 177 should be revised to "...as shown in Fig. 1." Ensure consistent abbreviation usage  
76 throughout the manuscript.

77 Response:

78 Thanks for pointing this out. Figure 1 in the original manuscript has been removed based on the  
79 opinion of Referee #1 and has been revised as Fig. S4 in SI. Therefore, the sentence has been  
80 revised to "... as shown in Fig. S4.". Please refer to line 175 in the main text. The abbreviation in  
81 the context has been rechecked.

82 6. In line 227, the "2" in "R<sup>2</sup>=0.9" is not in superscript. Please adjust the formatting for accuracy.

83 Response:

84 Thanks for pointing this out. The error here has been corrected. Please refer to line 223 in the  
85 modified manuscript.

86 7. The steps for qualitatively identifying organic compounds using mass spectrometry principles  
87 require further elaboration. Could the authors provide a detailed description of these procedures  
88 in the methods section?

89 Response:

90 Thanks for the comment. Taking alkanes as an example, compounds containing hydrocarbon chains  
91 give rise to a series of ions separated by 14 Da (-CH<sub>2</sub>-), as shown in Fig. 1. As a result, the top ions  
92 to identify alkanes would be m/z = 43, m/z = 57, m/z = 71, and m/z = 84. Due to the stability of  
93 chemical groups, generally, the abundance of m/z = 57 is highest, followed by m/z = 43 and m/z =  
94 71. When incorporating these rules into the data treatment software (Canvas, version 2.5, J&X  
95 Technologies), a few steps need to be taken, as shown in Fig. 2. Four built-in features can be

96 deployed. ABUND (X) returns the normalized abundance of the input ion mass; HASMASS (X)  
97 returns the value to indicate if the input ion exists; ORDER (X) returns the order of the input ion  
98 mass; MASS (X) returns the mass of the input ion's order. Additionally, the function allows two  
99 logical operators, "And" and "Or". Then, the cluster of alkanes can be extracted by the following  
100 rules:

101  $((\text{MASS}(1)=43 \ \&\& \ (\text{MASS}(2)=57 \ \parallel \ \text{MASS}(2)=71 \ \parallel \ \text{MASS}(2)=41))) \ \parallel \ (\text{MASS}(1)=57 \ \&\& \$   
102  $(\text{MASS}(2)=43 \ \parallel \ \text{MASS}(2)=71 \ \parallel \ \text{MASS}(2)=41)))$

103 where "&&" and "||" refer to the logical operators "And" and "Or", respectively. Paste the rules in  
104 Ion Extractor Editor and the cluster of alkanes can be filtered, as shown in Fig. 3.

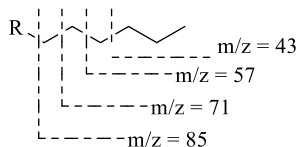

105

106 Figure 1. The common fragmentation patterns of n-alkanes.

Open Canvas → Open Browser → File → Load Data (load a sample) →  
Speciation → Find All Peaks → Mass Spectrum → Extraction Rules

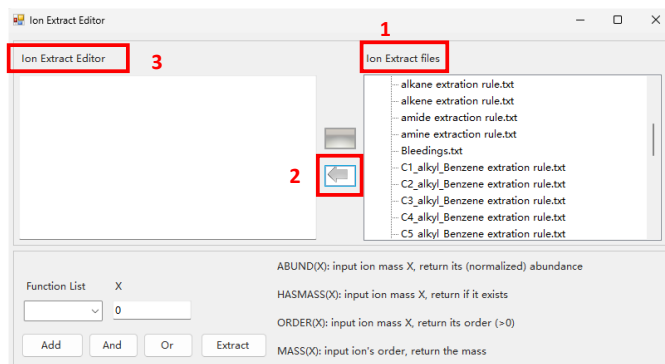

107

108 Figure 2. The steps to enable the ion extract function built in Canvas.

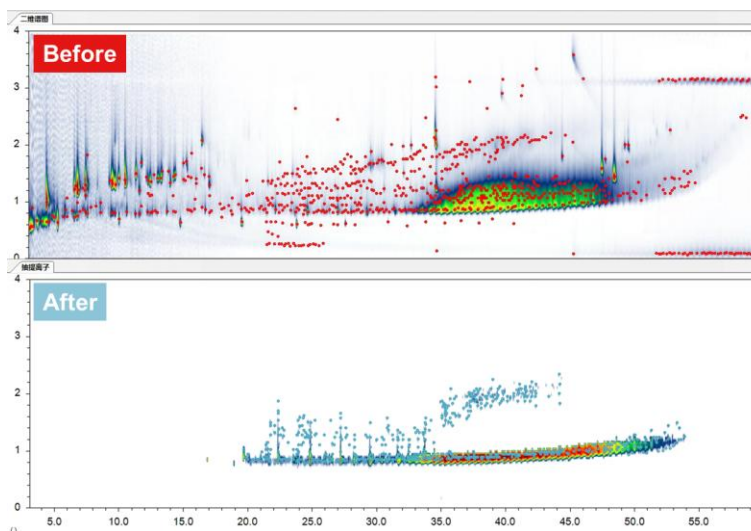

109

110 Figure 3. Comprehensive two-dimensional chromatograms before and after screening alkanes.  
111 Each red and blue point represents a chromatographic peak.

112 We have compiled the above explanation in SI. Please refer to line 37-59 in SI for detail.

113 8. Specify the number of test repetitions conducted for each vehicle. Additionally, indicate the  
114 sample sizes used for all calculations involving averages to enhance the transparency and  
115 reproducibility of the results.

116 Response:

117 Thanks for the comment. Table S1 in SI has been supplemented the number of test repetitions.

118 **“Table S1. Sets of test cycles.**

| No. | Vehicle ID | Ambient Temperature | Cold- or Hot-start Cycle | Repetitions |
|-----|------------|---------------------|--------------------------|-------------|
| 1   | D1         | 23°C                | Cold-start cycle         | 2           |
| 2   | D1         | 23°C                | Hot-start cycle          | 2           |
| 3   | D2         | 23°C                | Cold-start cycle         | 2           |
| 4   | D2         | 23°C                | Hot-start cycle          | 2           |
| 5   | D2         | 0°C                 | Hot-start cycle          | 2           |
| 6   | D3         | 23°C                | Cold-start cycle         | 3           |
| 7   | D3         | 23°C                | Hot-start cycle          | 3           |
| 8   | D4         | 23°C                | Cold-start cycle         | 3           |
| 9   | D4         | 23°C                | Hot-start cycle          | 3           |
| 10  | D4         | 0°C                 | Hot-start cycle          | 2           |

119 ”

120 Please refer to line 61 in SI for detail.

121 9. In Line 237-238: “The EF ratios across different volatility bins decreased with decreasing  
122 volatility, highlighting that the elevated I/SVOC EFs of HMTVs were primarily due to a marked  
123 increase in organics within the volatility range of bins 2 to 6.” But according to the Fig. 3, the  
124 I/SVOCs EFs of HMTVs and LMTVs exhibited a rebound within the volatility range of bins 2 to  
125 4. Is there any explanation for this phenomenon?

126 Response:

127 In fact, a similar volatility distribution phenomenon has also been found in previous studies on  
128 vehicle exhaust I/SVOC emissions. For example, both Zhao et al. (2015) and He et al. (2022) tested  
129 the exhaust from diesel vehicles and found an I/SVOC EF rebound around bin 2, as shown in the  
130 figure below, but they did not explain such a phenomenon. Liang et al. (2022) compared the  
131 I/SVOC volatility distribution in exhaust, diesel, and lubrication oil from an engine, using the  
132 Positive Matrix Factorization (PMF), and concluded that the EF rebound around bin 2 was  
133 attributed to the lubrication oil. However, we did not analyze the diesel and lubrication oil used in  
134 our test vehicles by TD-GC×GC-MS and without other evidence. We will improve in our future  
135 research.

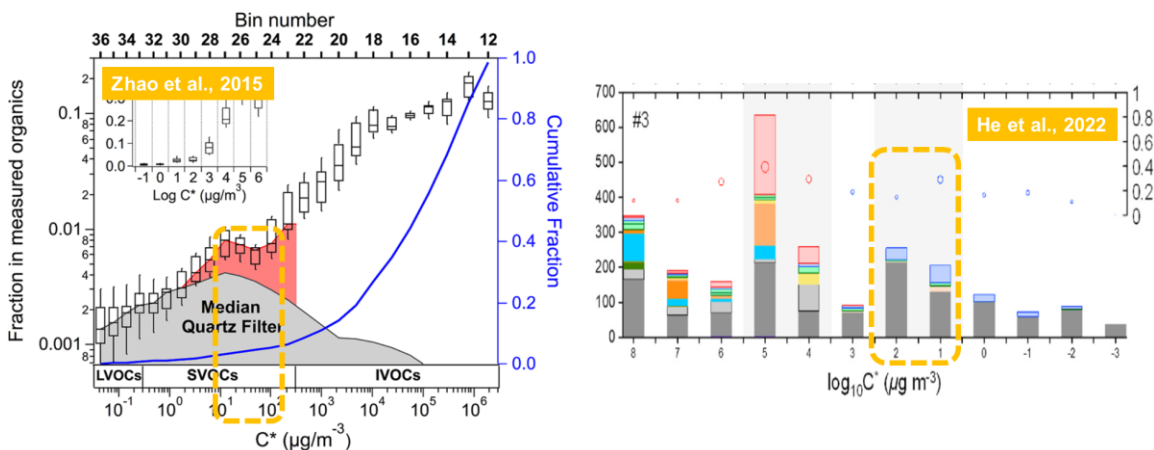

136

137 Figure 4. I/SVOC volatility distribution in the study of Zhao et al. (2015) and He et al. (2022).

138 10. Around line 240, there's a comparison of the proportions of HMV and LMV organic  
 139 compounds; was there also a comparison of different component emission factors (EFs)  
 140 between HMV and LMV? Are all substances higher in HMV?

141 Response:

142 Thanks for the comment. The EFs of all organic compounds emitted by HMVs are higher than that  
 143 of LMVs, but the magnitude of the increase varies. The supplementary figure below has been added  
 144 to the SI and the main text has been modified as follows:  
 145

“

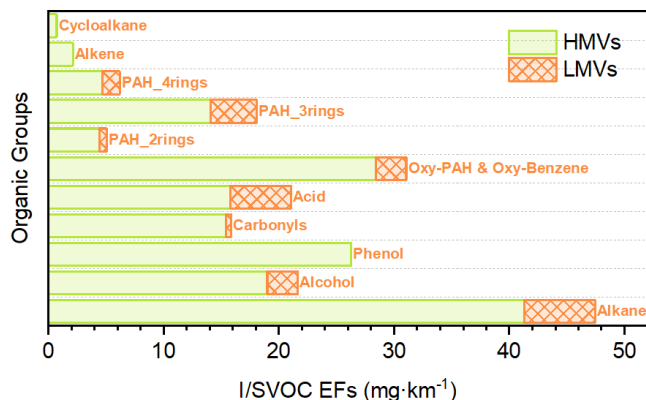

146 Figure S8. The average organic group distribution of HMVs and LMVs.”

147 “...To further compare volatility and category distribution, the average EFs of HMVs and LMVs  
 148 are shown separately in Fig. 2. The EF ratios across different volatility bins exhibited a decreasing  
 149 trend with decreasing volatility, indicating that the elevated I/SVOC EFs of HMVs were primarily  
 150 due to a marked increase in organics within the volatility range of bins 2 to 6. Figure 2 further  
 151 depicts the relative proportion of distinct organic groups present in I/SVOC emissions and their  
 152 EFs are shown in Fig. S8. The EFs of all organic compounds emitted by HMVs were higher than  
 153 those of LMVs, but the magnitude of the increase varied. Except for phenol, alkene, and  
 154 cycloalkane, the organic group with the highest HMV-LMV ratio was carbonyls, up to 34, as shown

155 in Fig. S8. The next highest is oxy-PAH & oxy-benzene, whose HMV-LMV ratio reached 11. The  
156 ratios of PAH\_2rings, alcohol, and alkane were 7. Overall, the HMV-LMV ratios of O-I/SVOCs  
157 were relatively higher, which contributed 65% of the I/SVOCs emissions from HMVs, compared  
158 to 42% for LMVs. Since the SOA yields of O-I/SVOCs are lower than those of hydrocarbon-like  
159 I/SVOCs in the same bin (Chacon-Madrid and Donahue, 2011), variations in O-I/SVOC  
160 proportions directly impacted the SOAFP gap between HMVs and LMVs, which would be further  
161 discussed in Sect. 3.5. Alkane and oxy-PAH & oxy-benzene were the dominant contributors to  
162 I/SVOCs for both HMVs and LMVs. PAH\_3rings contributed 8% of the I/SVOC emissions for  
163 HMVs, but 23% for LMVs. Interestingly, phenol, alkene, and cycloalkane were not detected in any  
164 of the LMV samples.”

165 [Please refer to line 238-242 in the main text and line 88 in SI for details.](#)

166 11. The introduction and the section on SOA prediction would benefit from additional supporting  
167 references. Consider including following studies that explore the generation and sources of  
168 urban particulate matter to provide a more robust foundation for your discussion.

- 169 • Jacob M. Sommers, Craig A. Stroud, Max G. Adam, Jason O'Brien, Jeffrey R. Brook, Katherine Hayden,  
170 Alex K. Y. Lee, Kun Li, John Liggio, Cristian Mihele, Richard L. Mittermeier, Robin G. Stevens,  
171 Mengistu Wolde, Andreas Zuend, Patrick L. Hayes (2022) Evaluating SOA formation from different  
172 sources of semi- and intermediate-volatility organic compounds from the Athabasca oil sands.  
173 Environmental Science: Atmospheres. DOI: 10.1039/d1ea00053e.
- 174 • Qingsong Wang; Juntao Huo; Hui Chen\*; Yusen Duan; Qingyan Fu; Yi Sun; Kun Zhang; Ling Huang;  
175 Yangjun Wang; Jiani Tan; Li Li\*; Lina Wang; Dan Li; Christian George; Abdelwahid Mellouki,  
176 &Jianmin Chen (2023) Traffic, marine ships and nucleation as the main sources of ultrafine particles in  
177 suburban Shanghai, China. Environmental Science: Atmospheres. DOI: 10.1039/d3ea00096f.
- 178 • Ling Huang, Hanqing Liu, Greg Yarwood, Gary Wilson, Jun Tao, Zhiwei Han, Dongsheng Ji, Yangjun  
179 Wang, Li Li\*. Modeling of secondary organic aerosols (SOA) based on two commonly used air quality  
180 models in China: Consistent S/IVOCs contribution but large differences in SOA aging. Science of the  
181 Total Environment 2023, 903, 166162. <https://doi.org/10.1016/j.scitotenv.2023.166162>.
- 182 • Yangjun Wang; Miao Ning; Qingfang Su; Lijuan Wang\*; Sen Jiang; Yueyi Feng; Weiling Wu; Qian Tang;  
183 Shiyu Hou; Jinting Bian; Ling Huang; Guibin Lu; Kasemsan Manomaiphiboon; Burcak Kaynak; Kun  
184 Zhang; Hui Chen, &Li Li\* (2024) Designing regional joint prevention and control schemes of PM2.5  
185 based on source apportionment of chemical transport model: A case study of a heavy pollution episode.  
186 Journal of Cleaner Production. DOI: 10.1016/j.jclepro.2024.142313.
- 187 • Sahir Azmi, Mukesh Sharma (2023) Global PM<sub>2.5</sub> and secondary organic aerosols (SOA) levels with  
188 sectorial contribution to anthropogenic and biogenic SOA formation. Chemosphere.  
189 <https://doi.org/10.1016/j.chemosphere.2023.139195>.

190 [Response:](#)

191 [Thanks for the suggestion. We have included these up-to-date relevant papers for reference and the](#)  
192 [main text has been revised as follows:](#)

193 “As a major air pollutant, fine particulate matter (PM<sub>2.5</sub>) leads to over three million premature  
194 deaths globally each year (Apte et al., 2018), mainly associated with lung cancer, ischemic heart  
195 disease, and stroke (Guan et al., 2018; Xue et al., 2021). Secondary organic aerosol (SOA) accounts  
196 for 12% to 77% of the total PM<sub>2.5</sub> mass based on global source apportionment results (Huang et al.,  
197 2014; Sun et al., 2020; Zhang et al., 2021). Observation studies have demonstrated that SOA

198 contributions increase with the severity of pollution during haze episodes in megacities in China  
199 (He et al., 2020; Ho, 2016; Li et al., 2015; [Azmi et al., 2023](#); [Wang et al., 2023](#); [Wang et al., 2024](#)).  
200 Among potential SOA precursors, intermediate-volatility and semi-volatile organic compounds  
201 (I/SVOCs), with effective saturation concentrations ( $C^*$ ) between  $10^3$  to  $10^6$  and  $10^0$  to  $10^2$   $\mu\text{g}\cdot\text{m}^{-3}$ ,  
202 have been demonstrated to be more effective than volatile organic compounds (VOCs) (Daniel S.  
203 Tkacik et al., 2012; Jathar et al., 2013; Morino et al., 2022; [Sommers et al., 2022](#); [Huang et al.,](#)  
204 [2023](#)). ...”

205 **“Reference ...**

206 [Azmi, S. and Sharma, M.: Global PM<sub>2.5</sub> and secondary organic aerosols \(SOA\) levels with](#)  
207 [sectorial contribution to anthropogenic and biogenic SOA formation, Chemosphere, 336, 139195,](#)  
208 <https://doi.org/10.1016/j.chemosphere.2023.139195>, 2023.

209 ...

210 [Huang, L., Liu, H., Yarwood, G., Wilson, G., Tao, J., Han, Z., Ji, D., Wang, Y., and Li, L.: Modeling](#)  
211 [of secondary organic aerosols \(SOA\) based on two commonly used air quality models in China:](#)  
212 [Consistent S/IVOCs contribution but large differences in SOA aging, Sci Total Environ, 903,](#)  
213 [166162, https://doi.org/10.1016/j.scitotenv.2023.166162](https://doi.org/10.1016/j.scitotenv.2023.166162), 2023.

214 ...

215 [Sommers, J. M., Stroud, C. A., Adam, M. G., O’Brien, J., Brook, J. R., Hayden, K., Lee, A. K. Y.,](#)  
216 [Li, K., Liggió, J., Mihele, C., Mittermeier, R. L., Stevens, R. G., Wolde, M., Zuend, A., and Hayes,](#)  
217 [P. L.: Evaluating SOA formation from different sources of semi- and intermediate-volatility organic](#)  
218 [compounds from the Athabasca oil sands, Environ. Sci.: Atmos., 2, 469–490,](#)  
219 <https://doi.org/10.1039/D1EA00053E>, 2022.

220 ...

221 [Wang, Q., Huo, J., Chen, H., Duan, Y., Fu, Q., Sun, Y., Zhang, K., Huang, L., Wang, Y., Tan, J., Li,](#)  
222 [L., Wang, L., Li, D., George, C., Mellouki, A., and Chen, J.: Traffic, marine ships and nucleation](#)  
223 [as the main sources of ultrafine particles in suburban Shanghai, China, Environ. Sci.: Atmos., 3,](#)  
224 [1805–1819, https://doi.org/10.1039/D3EA00096F](https://doi.org/10.1039/D3EA00096F), 2023.

225 [Wang, Y., Ning, M., Su, Q., Wang, L., Jiang, S., Feng, Y., Wu, W., Tang, Q., Hou, S., Bian, J.,](#)  
226 [Huang, L., Lu, G., Manomaiphiboon, K., Kaynak, B., Zhang, K., Chen, H., and Li, L.: Designing](#)  
227 [regional joint prevention and control schemes of PM<sub>2.5</sub> based on source apportionment of chemical](#)  
228 [transport model: A case study of a heavy pollution episode, Journal of Cleaner Production, 455,](#)  
229 [142313, https://doi.org/10.1016/j.jclepro.2024.142313](https://doi.org/10.1016/j.jclepro.2024.142313), 2024.

230 ...”

231 Please refer to line 38-41, 370, 421, 460, and 474-480 in main text for details.

232

233



234 **Reference:**

- 235 He, X., Zheng, X., You, Y., Zhang, S., Zhao, B., Wang, X., Huang, G., Chen, T., Cao, Y., He, L., Chang,  
236 X., Wang, S., and Wu, Y.: Comprehensive chemical characterization of gaseous I/SVOC emissions from  
237 heavy-duty diesel vehicles using two-dimensional gas chromatography time-of-flight mass spectrometry,  
238 *Environ. Pollut.*, 305, 119284, <https://doi.org/10.1016/j.envpol.2022.119284>, 2022b.
- 239 Liang, Z., Yu, Z., and Chen, L.: Quantifying the contributions of diesel fuel and lubricating oil to the  
240 SVOC emissions from a diesel engine using GC × GC-ToFMS, *Fuel*, 310, 122409,  
241 <https://doi.org/10.1016/j.fuel.2021.122409>, 2022.
- 242 Zhang, X., He, X., Cao, Y., Chen, T., Zheng, X., Zhang, S., and Wu, Y.: Comprehensive characterization  
243 of speciated volatile organic compounds (VOCs), gas-phase and particle-phase intermediate- and semi-  
244 volatile volatility organic compounds (I/S-VOCs) from Chinese diesel trucks, *Sci. Total Environ.*, 912,  
245 168950, <https://doi.org/10.1016/j.scitotenv.2023.168950>, 2024.
- 246 Zhao, Y., Nguyen, N. T., Presto, A. A., Hennigan, C. J., May, A. A., and Robinson, A. L.: Intermediate  
247 volatility organic compound emissions from on-road diesel vehicles: chemical composition, emission  
248 factors, and estimated secondary organic aerosol production, *Environ. Sci. Technol.*, 49, 11516–11526,  
249 <https://doi.org/10.1021/acs.est.5b02841>, 2015.
