# Supplementary material for: Emissions of Intermediate- and Semi-Volatile Organic Compounds (I/SVOCs) from Different Cumulative Mileage Diesel Vehicles under Various Ambient Temperatures
Source: Copernicus journal article supplement (doi:10.5194/egusphere-2024-3290), 2024-11-04
Supplement: Supplementary file [file egusphere-2024-3290-CC1-supplement.zip]

**Supporting Information for:**

**Emissions of Intermediate- and Semi-Volatile Organic Compounds (I/SVOCs)  
from Different Cumulative Mileage Diesel Vehicles under Various Ambient  
Temperatures**

Shuwen Guo<sup>1</sup>, Xuan Zheng<sup>1\*</sup>, Xiao He<sup>1</sup>, Lewei Zeng<sup>1</sup>, Xian Wu<sup>2</sup>, Liqiang He<sup>2</sup>, Yifei Dai<sup>3</sup>, Zihao Huang<sup>1</sup>, Ting Chen<sup>4</sup>, Shupeixiao<sup>1</sup>, Chongzhi Zhong<sup>5</sup>, Yunjing Wang<sup>2</sup>, Yan You<sup>6</sup>, Sheng Xiang<sup>7</sup>, Yan Ding<sup>2</sup>, Shaojun Zhang<sup>4</sup>, Jingkun Jiang<sup>4</sup>, and Ye Wu<sup>4</sup>

<sup>1</sup>College of Chemistry and Environmental Engineering, Shenzhen University, Shenzhen 518060, China

<sup>2</sup>State Environmental Protection Key Laboratory of Vehicle Emission Control and Simulation, Chinese Research Academy of Environmental Sciences, Beijing 100012, China

<sup>3</sup>Institute for Advanced Study, Shenzhen University, Shenzhen 518060, China

<sup>4</sup>School of Environment, State Key Joint Laboratory of Environment Simulation and Pollution Control, Tsinghua University, Beijing 100084, China

<sup>5</sup>China Automotive Technology and Research Centre Co., Ltd., Guangzhou 511300, China

<sup>6</sup>National Observation and Research Station of Coastal Ecological Environments in Macao, Macao Environmental Research Institute, Macau University of Science and Technology, Macao SAR 999078, China

<sup>7</sup>State Key Laboratory of Pollution Control and Resource Reuse, Tongji University, Shanghai, China 200092, China

*Correspondence to:* Xuan Zheng (x-zheng11@szu.edu.cn)

**Summary of the Supporting Information:**

Pages: 9

Supplementary Table: 3

Supplementary Figures: 8

### SI-1. Description of all organic category names.

Alkane: n-alkane and i-alkane. Alcohol: aliphatic alcohol. Phenol: organics containing one benzene ring and a hydrocarbon group directly attached to the benzene ring. Carbonyls: aliphatic ketone and aliphatic aldehyde. Acid: aliphatic acid. Oxy-PAH & Oxy-benzene: organic compounds containing benzene rings and oxygen-containing groups, except for phenols whose hydroxyl group is directly connected to one benzene ring. PAH\_2rings: PAH with 2 benzene rings. PAH\_3rings: PAH with 3 benzene rings. PAH\_4rings: PAH with 4 benzene rings. Alkene: organics containing carbon double bond(s) without any other function groups. Cycloalkane: organics containing a saturated carbon ring without any other function groups.

### SI-2. Description of the steps for qualitatively identifying organic compounds using mass spectrometry principles.

Taking alkanes as an example, compounds containing hydrocarbon chains give rise to a series of ions separated by 14 Da ( $-\text{CH}_2-$ ), as shown in Fig. SI1. As a result, the top ions to identify alkanes would be  $m/z = 43$ ,  $m/z = 57$ ,  $m/z = 71$ , and  $m/z = 84$ . Due to the stability of chemical groups, generally, the abundance of  $m/z = 57$  is highest, followed by  $m/z = 43$  and  $m/z = 71$ . When incorporating these rules into the data treatment software (Canvas, version 2.5, J&X Technologies), a few steps need to be taken, as shown in Fig. SI2. Four built-in features can be deployed. ABUND(X) returns the normalized abundance of the input ion mass; HASMASS(X) returns the value to indicate if the input ion exists; ORDER(X) returns the order of the input ion mass; MASS(X) returns the mass of the input ion's order. Additionally, the function allows two logical operators, "And" and "Or". Then, the cluster of alkanes can be extracted by the following rules:

$((\text{MASS}(1)=43 \ \&\& \ (\text{MASS}(2)=57 \ || \ \text{MASS}(2)=71 \ || \ \text{MASS}(2)=41)) \ || \ (\text{MASS}(1)=57 \ \&\& \ (\text{MASS}(2)=43 \ || \ \text{MASS}(2)=71 \ || \ \text{MASS}(2)=41)))$

where "&&" and "||" refer to the logical operators "And" and "Or", respectively. Paste the rules in Ion Extractor Editor and the cluster of alkanes can be filtered, as shown in Fig. SI3.

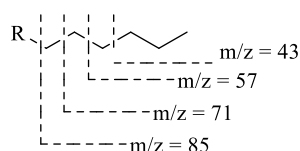

Figure SI1. The common fragmentation patterns of n-alkanes.

Open Canvas → Open Browser → File → Load Data (load a sample) → Speciation → Find All Peaks → Mass Spectrum → Extraction Rules

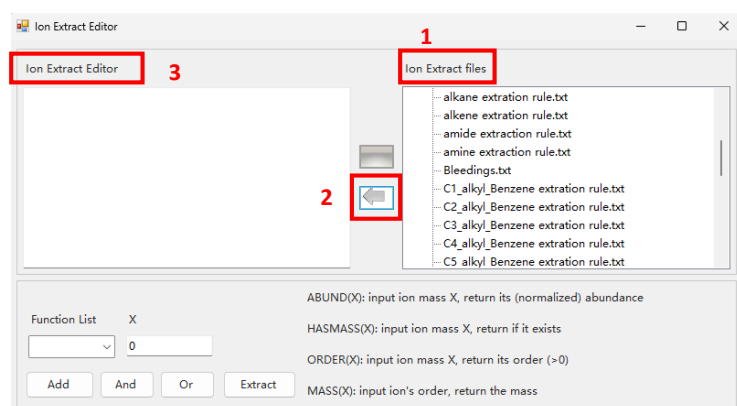

Figure SI2. The steps to enable the ion extract function built in Canvas.

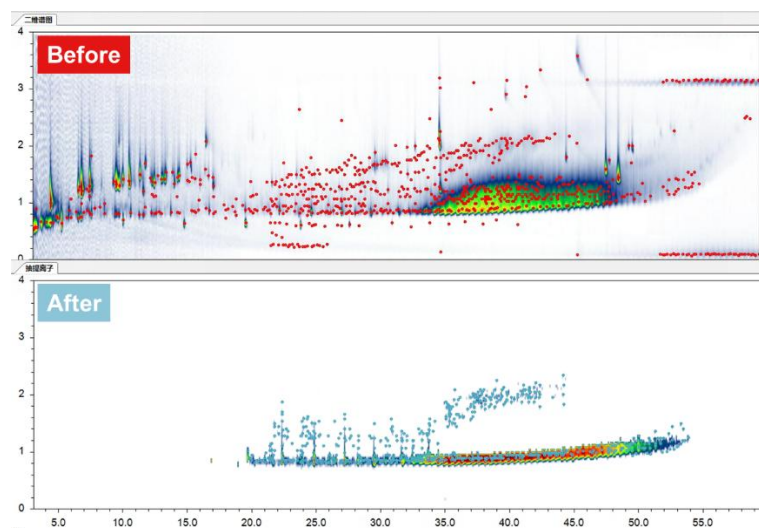

Figure S13. Comprehensive two-dimensional chromatograms before and after screening alkanes. Each red and blue point represents a chromatographic peak.

**Table S1. Sets of test cycles.**

| No. | Vehicle ID | Ambient Temperature | Cold- or Hot-start Cycle | Repetitions |
|-----|------------|---------------------|--------------------------|-------------|
| 1   | D1         | 23°C                | Cold-start cycle         | 2           |
| 2   | D1         | 23°C                | Hot-start cycle          | 2           |
| 3   | D2         | 23°C                | Cold-start cycle         | 2           |
| 4   | D2         | 23°C                | Hot-start cycle          | 2           |
| 5   | D2         | 0°C                 | Hot-start cycle          | 2           |
| 6   | D3         | 23°C                | Cold-start cycle         | 3           |
| 7   | D3         | 23°C                | Hot-start cycle          | 3           |
| 8   | D4         | 23°C                | Cold-start cycle         | 3           |
| 9   | D4         | 23°C                | Hot-start cycle          | 3           |
| 10  | D4         | 0°C                 | Hot-start cycle          | 2           |

**Table S2. The list of 120 external standard curves used in this study.**

| No. | Groups | Name        | Molecular Formula               | Cas No.   | R <sup>2</sup> |
|-----|--------|-------------|---------------------------------|-----------|----------------|
| 1   | Alkane | Heptane     | C <sub>7</sub> H <sub>16</sub>  | 142-82-5  | 0.973          |
| 2   | Alkane | Octane      | C <sub>8</sub> H <sub>18</sub>  | 111-65-9  | 0.984          |
| 3   | Alkane | Nonane      | C <sub>9</sub> H <sub>20</sub>  | 111-84-2  | 0.996          |
| 4   | Alkane | Decane      | C <sub>10</sub> H <sub>22</sub> | 124-18-5  | 0.995          |
| 5   | Alkane | Undecane    | C <sub>11</sub> H <sub>24</sub> | 1120-21-4 | 0.992          |
| 6   | Alkane | Dodecane    | C <sub>12</sub> H <sub>26</sub> | 112-40-3  | 0.973          |
| 7   | Alkane | Tridecane   | C <sub>13</sub> H <sub>28</sub> | 629-50-5  | 0.975          |
| 8   | Alkane | Tetradecane | C <sub>14</sub> H <sub>30</sub> | 629-59-4  | 0.985          |
| 9   | Alkane | Pentadecane | C <sub>15</sub> H <sub>32</sub> | 629-62-9  | 0.987          |
| 10  | Alkane | Hexadecane  | C <sub>16</sub> H <sub>34</sub> | 544-76-3  | 0.988          |
| 11  | Alkane | heptadecane | C <sub>17</sub> H <sub>36</sub> | 629-78-7  | 0.975          |
| 12  | Alkane | Octadecane  | C <sub>18</sub> H <sub>38</sub> | 593-45-3  | 0.969          |

| No. | Groups    | Name                  | Molecular<br>Formula | Cas No.    | R <sup>2</sup> |
|-----|-----------|-----------------------|----------------------|------------|----------------|
| 13  | Alkane    | Nonadecane            | C19H40               | 629-92-5   | 0.987          |
| 14  | Alkane    | Eicosane              | C20H42               | 112-95-8   | 0.961          |
| 15  | Alkane    | Heneicosane           | C21H44               | 629-94-7   | 0.962          |
| 16  | Alkane    | Docosane              | C22H46               | 629-97-0   | 0.976          |
| 17  | Alkane    | Tricosane             | C23H48               | 638-67-5   | 0.971          |
| 18  | Alkane    | Tetracosane           | C24H50               | 646-31-1   | 0.973          |
| 19  | Alkane    | Pentacosane           | C25H52               | 629-99-2   | 0.995          |
| 20  | Alkane    | Hexacosane            | C26H54               | 630-01-3   | 0.990          |
| 21  | Alkane    | Heptacosane           | C27H56               | 593-49-7   | 0.977          |
| 22  | Alkane    | Octacosane            | C28H58               | 630-02-4   | 0.982          |
| 23  | Alkane    | Nonacosane            | C29H60               | 630-03-5   | 0.972          |
| 24  | Alkane    | triacontane           | C30H62               | 638-68-6   | 0.963          |
| 25  | Alkane    | Hentriacontane        | C31H64               | 630-04-6   | 0.971          |
| 26  | Alkane    | Dotriacontane         | C32H66               | 544-85-4   | 0.956          |
| 27  | Alkane    | Tritriacontane        | C33H68               | 630-05-7   | 0.959          |
| 28  | Alkane    | Tetratriacontane      | C34H70               | 14167-59-0 | 0.957          |
| 29  | Alkane    | Pentatriacontane      | C35H72               | 630-07-9   | 0.989          |
| 30  | Alkane    | Hexatriacontane       | C36H74               | 630-06-8   | 0.980          |
| 31  | Alkane    | Heptatriacontane      | C37H76               | 7194-84-5  | 0.989          |
| 32  | Alkene    | Octene                | C8H16                | 111-66-0   | 0.992          |
| 33  | Alkene    | Decene                | C10H20               | 872-05-9   | 0.982          |
| 34  | Alkene    | Dodecene              | C12H24               | 112-41-4   | 0.959          |
| 35  | Alkene    | Tetradecene           | C14H28               | 1120-36-1  | 0.976          |
| 36  | Alkene    | Hexadecene            | C16H32               | 629-73-2   | 0.985          |
| 37  | Alkene    | Octadecene            | C18H36               | 112-88-9   | 0.986          |
| 38  | Alkene    | Eicosene              | C20H40               | 3452-07-1  | 0.988          |
| 39  | Alkene    | Docosene              | C22H44               | 1599-67-3  | 0.987          |
| 40  | Alkyl-PAH | Methylnaphthalene     | C11H10               | 90-12-0    | 0.997          |
| 41  | Acid      | Isobutyric Acid       | C4H8O2               | 79-31-2    | 0.989          |
| 42  | Acid      | 2-Methyl butyric acid | C5H10O2              | 116-53-0   | 0.986          |
| 43  | Acid      | Tetradecanoic acid    | C11H22O2             | 544-63-8   | 0.981          |
| 44  | Acid      | heptadecanoic acid    | C14H28O2             | 506-12-7   | 0.984          |
| 45  | Acid      | Undecanoic acid       | C17H34O2             | 112-37-8   | 0.984          |
| 46  | Alcohol   | Decanol               | C10H22O              | 112-30-1   | 0.982          |
| 47  | Alcohol   | Tridecanol            | C13H28O              | 26248-42-0 | 0.987          |
| 48  | Alcohol   | Hexadecanol           | C16H34O              | 36653-82-4 | 0.961          |
| 49  | Alcohol   | Nonadecanol           | C19H40O              | 1454-84-8  | 0.953          |
| 50  | Alcohol   | Docosanol             | C22H46O              | 661-19-8   | 0.994          |
| 51  | Aldehyde  | Valeraldehyde         | C5H10O               | 110-62-3   | 0.966          |
| 52  | Aldehyde  | 1-Pentanecarbaldehyde | C6H12O               | 66-25-1    | 0.996          |
| 53  | Aldehyde  | Octanal               | C8H16O               | 124-13-0   | 0.995          |
| 54  | Aldehyde  | Decylaldehyde         | C10H20O              | 112-31-2   | 0.994          |

| No. | Groups      | Name                   | Molecular Formula | Cas No.    | R <sup>2</sup> |
|-----|-------------|------------------------|-------------------|------------|----------------|
| 55  | Aldehyde    | Dodecanal              | C12H24O           | 112-54-9   | 0.957          |
| 56  | Aldehyde    | Tetradecanal           | C14H28O           | 124-25-4   | 0.978          |
| 57  | Aldehyde    | Hexadecanal            | C16H32O           | 629-80-1   | 0.955          |
| 58  | Aldehyde    | Octadecanone           | C18H36O           | 638-66-4   | 0.968          |
| 59  | Aldehyde    | Icosanal               | C20H40O           | 2400-66-0  | 0.959          |
| 60  | Aldehyde    | Docosanal              | C22H44O           | 57402-36-5 | 0.952          |
| 61  | Alkyl-PAH   | Ethyl-naphthalene      | C12H12            | 1127-76-0  | 0.971          |
| 62  | Amide       | Acetamide              | C2H5NO            | 60-35-5    | 1.000          |
| 63  | Amide       | Propanamide            | C3H7NO            | 79-05-0    | 0.960          |
| 64  | Amide       | N,N-Dibutylformamide   | C9H19NO           | 761-65-9   | 0.952          |
| 65  | Amine       | Triethylamine          | C6H15N            | 121-44-8   | 0.986          |
| 66  | Amine       | Aniline                | C6H7N             | 62-53-3    | 0.981          |
| 67  | Amine       | 2-Aminoaniline         | C6H8N2            | 95-54-5    | 0.997          |
| 68  | Amine       | Dibutylamine           | C8H19N            | 111-92-2   | 0.990          |
| 69  | Amine       | 1-Naphthalenamine      | C10H9N            | 134-32-7   | 0.962          |
| 70  | Amine       | 4-Biphenylamine        | C12H11N           | 92-67-1    | 0.994          |
| 71  | Aromatic    | Ethylbenzene           | C8H10             | 100-41-4   | 0.996          |
| 72  | Aromatic    | p-xylene               | C8H10             | 106-42-3   | 0.993          |
| 73  | Aromatic    | o-xylene               | C8H10             | 95-47-6    | 0.993          |
| 74  | Aromatic    | Isopropylbenzene       | C9H12             | 98-82-8    | 0.995          |
| 75  | Aromatic    | 4-Ethyltoluene         | C9H12             | 622-96-8   | 0.982          |
| 76  | Aromatic    | 1,3,5-trimethylbenzene | C9H12             | 108-67-8   | 0.993          |
| 77  | Aromatic    | p-Cymene               | C10H14            | 99-87-6    | 0.966          |
| 78  | Aromatic    | butyl-benzene          | C10H14            | 104-51-8   | 0.993          |
| 79  | Aromatic    | pentyl-benzene         | C11H16            | 538-68-1   | 0.974          |
| 80  | Aromatic    | hexyl-benzene          | C12H18            | 1077-16-3  | 0.973          |
| 81  | Cycloalkane | Ethyl-cyclohexane      | C8H16             | 1678-91-7  | 0.950          |
| 82  | Cycloalkane | Butyl-cyclohexane      | C10H20            | 1678-93-9  | 0.986          |
| 83  | Cycloalkane | Hexyl-cyclohexane      | C12H24            | 4292-75-5  | 0.968          |
| 84  | Cycloalkane | Octyl-cyclohexane      | C14H28            | 1795-15-9  | 0.950          |
| 85  | Cycloalkane | Decyl-cyclohexane      | C16H32            | 1795-16-0  | 0.955          |
| 86  | Cycloalkane | Dodecyl-cyclohexane    | C18H36            | 1795-17-1  | 0.974          |
| 87  | Cycloalkane | Tetradecyl-cyclohexane | C20H40            | 1795-18-2  | 0.969          |
| 88  | Cycloalkane | Hexadecyl-cyclohexane  | C22H44            | 6812-38-0  | 0.979          |
| 89  | Ester       | Butyl acetate          | C6H12O2           | 123-86-4   | 0.979          |
| 90  | Ester       | Isoamyl Acetate        | C7H14O2           | 123-92-2   | 0.995          |
| 91  | Ester       | Amyl Acetate           | C7H14O2           | 628-63-7   | 0.973          |
| 92  | Furan       | Furan                  | C4H4O             | 110-00-9   | 0.961          |
| 93  | Ketone      | 2-Pentanone            | C5H10O2           | 107-87-9   | 0.990          |
| 94  | Ketone      | 3-Heptanone            | C7H14O            | 106-35-4   | 0.995          |
| 95  | Ketone      | 2-Nonanone             | C9H18O            | 821-55-6   | 0.984          |
| 96  | Ketone      | 2-Dodecanone           | C12H24O           | 6175-49-1  | 0.972          |

| No. | Groups      | Name                          | Molecular Formula                              | Cas No.    | R <sup>2</sup> |
|-----|-------------|-------------------------------|------------------------------------------------|------------|----------------|
| 97  | Ketone      | Pentadecanone                 | C <sub>15</sub> H <sub>30</sub> O              | 2345-28-0  | 0.986          |
| 98  | Oxy-PAH     | 1,4-naphthoquinone            | C <sub>10</sub> H <sub>6</sub> O <sub>2</sub>  | 130-15-4   | 0.994          |
| 99  | Oxy-PAH     | 1-naphthaldehyde              | C <sub>11</sub> H <sub>8</sub> O               | 66-77-3    | 0.982          |
| 100 | Oxy-PAH     | 9,10-anthraquinone            | C <sub>14</sub> H <sub>8</sub> O <sub>2</sub>  | 84-65-1    | 0.992          |
| 101 | Oxy-PAH     | benzo[a]anthracene-7,12-dione | C <sub>18</sub> H <sub>10</sub> O <sub>2</sub> | 2498-66-0  | 0.983          |
| 102 | PAH         | Indene                        | C <sub>9</sub> H <sub>8</sub>                  | 95-13-6    | 0.990          |
| 103 | PAH         | Naphthalene                   | C <sub>10</sub> H <sub>8</sub>                 | 91-20-3    | 0.997          |
| 104 | PAH         | Acenaphthylene                | C <sub>12</sub> H <sub>8</sub>                 | 208-96-8   | 0.996          |
| 105 | PAH         | Acenaphthene                  | C <sub>12</sub> H <sub>10</sub>                | 83-32-9    | 0.989          |
| 106 | PAH         | Fluorene                      | C <sub>13</sub> H <sub>10</sub>                | 86-73-7    | 0.997          |
| 107 | PAH         | Phenanthrene                  | C <sub>14</sub> H <sub>10</sub>                | 85-01-8    | 0.994          |
| 108 | PAH         | Anthracene                    | C <sub>14</sub> H <sub>10</sub>                | 120-12-7   | 0.992          |
| 109 | PAH         | Pyrene                        | C <sub>16</sub> H <sub>10</sub>                | 129-00-0   | 0.992          |
| 110 | PAH         | Benz[a]anthracene             | C <sub>18</sub> H <sub>12</sub>                | 56-55-3    | 0.973          |
| 111 | PAH         | Chrysene                      | C <sub>18</sub> H <sub>12</sub>                | 218-01-9   | 0.973          |
| 112 | PAH         | Benzo[b]fluoranthene          | C <sub>20</sub> H <sub>12</sub>                | 205-99-2   | 0.961          |
| 113 | PAH         | Benzo[k]fluoranthene          | C <sub>20</sub> H <sub>12</sub>                | 207-08-9   | 0.983          |
| 114 | PAH         | Benzo[a]pyrene                | C <sub>20</sub> H <sub>12</sub>                | 50-32-8    | 0.967          |
| 115 | PAH         | Indeno[1,2,3-cd]fluoranthene  | C <sub>22</sub> H <sub>12</sub>                | 193-39-5   | 0.991          |
| 116 | Pinene      | (+)-alpha-Pinene              | C <sub>10</sub> H <sub>16</sub>                | 7785-70-8  | 0.950          |
| 117 | Pinene      | β-Pinene                      | C <sub>10</sub> H <sub>16</sub>                | 18172-67-3 | 0.991          |
| 118 | Polyphenyls | Biphenyl                      | C <sub>12</sub> H <sub>10</sub>                | 92-52-4    | 0.952          |
| 119 | Polyphenyls | p-terphenyl                   | C <sub>18</sub> H <sub>14</sub>                | 92-94-4    | 0.967          |
| 120 | Polyphenyls | p-quaterphenyl                | C <sub>24</sub> H <sub>18</sub>                | 135-70-6   | 0.987          |

**Table S3. Average THC, NO<sub>x</sub>, and CO EFs for LMV and HMY, respectively.**

| Vehicle  | Test Cycle | THC (mg·km <sup>-1</sup> ) | NO <sub>x</sub> (mg·km <sup>-1</sup> ) | CO (mg·km <sup>-1</sup> ) |
|----------|------------|----------------------------|----------------------------------------|---------------------------|
| LMV (D2) | Hot_23°C   | 35                         | 6951                                   | 600                       |
|          | Hot_0°C    | 38                         | 8048                                   | 657                       |
| HMY (D4) | Hot_23°C   | 289                        | 2629                                   | 359                       |
|          | Hot_0°C    | 302                        | 3555                                   | 404                       |

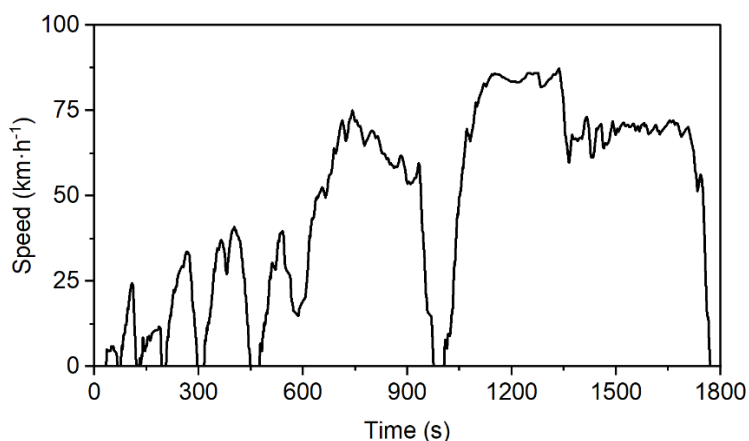

**Figure S1. CHTC-TT test cycle for tractor trailers.** The cycle lasts 1800 s, with the first 473 s as phase 1 and the last 1327 s as phase 2. The total driving distance is about 23 km, and the maximum speed is 88 km·h<sup>-1</sup>.

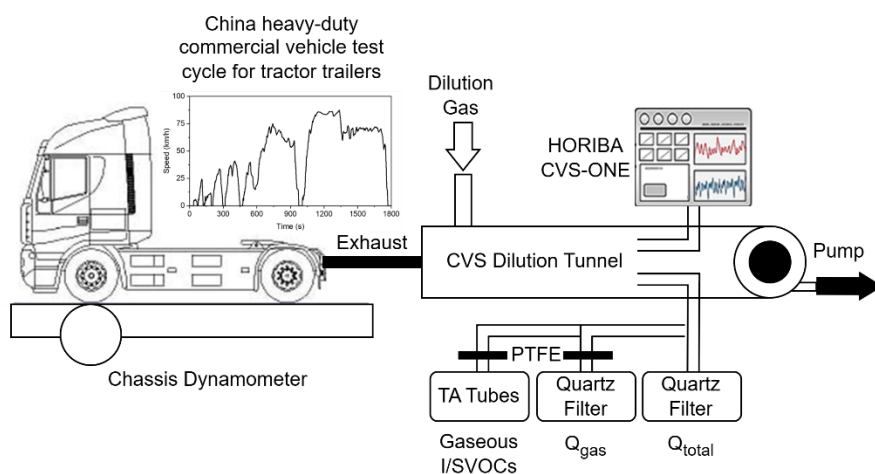

**Figure S2. A schematic of the sampling systems.**

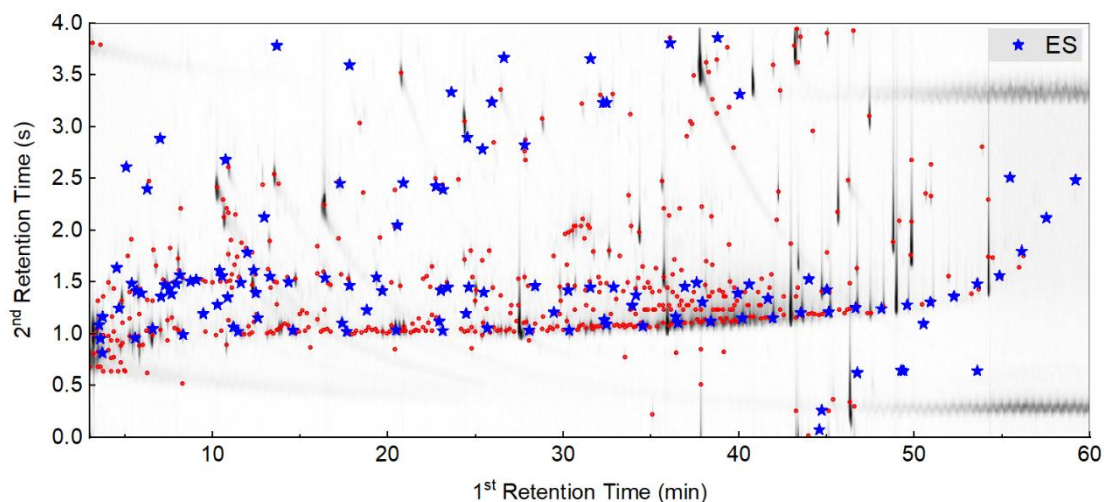

**Figure S3. Actual GC×GC chromatogram and sample chromatographic peaks (the red dots).** The blue stars represent all ES used in this study including n-alkanes, PAHs, carbonyls, etc. All their

77 detailed information was listed in Table S1.

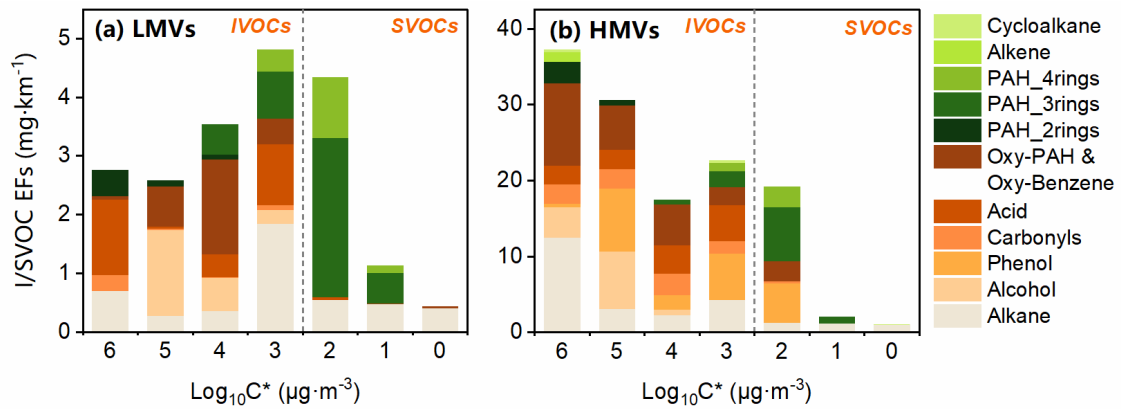

78

79 **Figure S4. The average volatility distribution of I/SVOCs from the (a) LMVs and (b) HMVs.**

80 Different colored bars represent different organic groups.

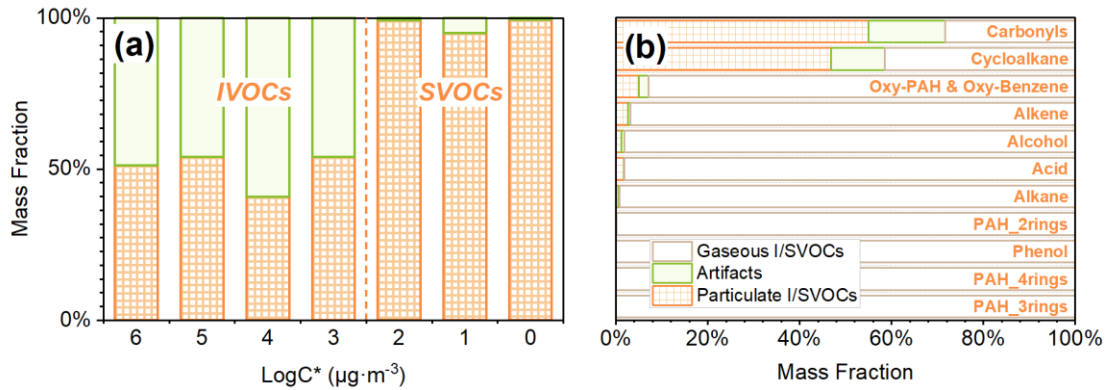

81

82 **Figure S5.(a) The mass fraction of artifacts and particulate I/SVOCs divided by C\* captured by**

83 **quartz. (b) Gas-particle partition and artifacts of various organic compound groups.**

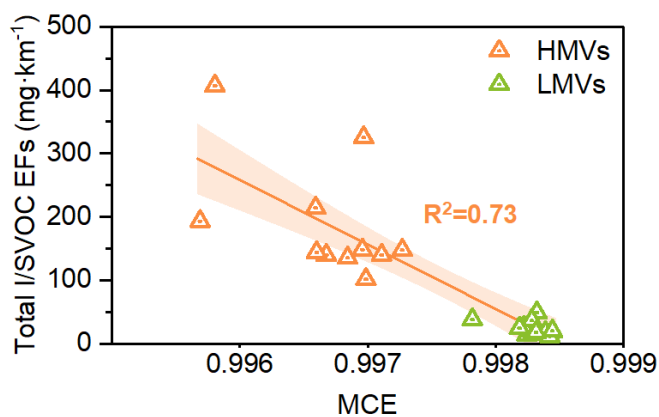

84

85 **Figure S6. The linear correlation between total I/SVOC EFs and MCE.**



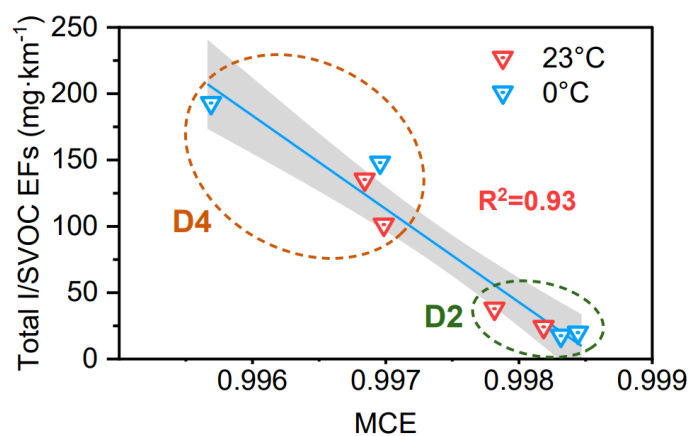

Figure S7. The linear correlation between hot-start cycle I/SVOC EFs and MCE of LMV (D2) and HMV (D4) at different ambient temperatures.

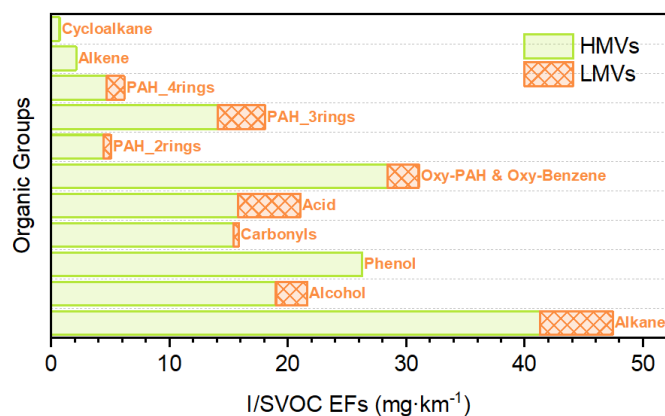

Figure S8. The average organic group distribution of HMVs and LMVs.
